# Supplementary material for: Anion-driven mesogenicity: a comparative study of ionic liquid crystals based on the [closo-1-CB9H10]− and [closo-1-CB11H12]− clusters
Source: Royal Society of Chemistry journal article supplement (doi:10.1039/c2jm15448j), 2012-01-01
Supplement: c2jm15448j.pdf [file c2jm15448j.pdf]

## Electronic Supplementary Information for

### **Anion-Driven Mesogenicity: A Comparative Study of Ionic Liquid Crystals Based on the [*closo*-1-CB<sub>9</sub>H<sub>10</sub>]<sup>-</sup> and [*closo*-1-CB<sub>11</sub>H<sub>12</sub>]<sup>-</sup> Clusters.**

Bryan Ringstrand<sup>a</sup>, Lillian E. Johnson<sup>a</sup>, Piotr Kaszynski<sup>a,b\*</sup>, Damian Pocięcha<sup>c</sup>, and Ewa  
Górecka<sup>c</sup>

*<sup>a</sup>Organic Materials Research Group*

*<sup>a</sup>Department of Chemistry, Vanderbilt University, Nashville, TN 37235*

*<sup>b</sup>Faculty of Chemistry, University of Łódź, 91403 Łódź, Poland*

*<sup>c</sup>Department of Chemistry, Warsaw University, 02-089 Warsaw, Poland*

#### **Table of Content:**

|                                                  |         |
|--------------------------------------------------|---------|
| 1. Synthetic and analytical details              | ....S2  |
| 2. Transition temperatures for binary mixtures   | ....S16 |
| 3. Powder XRD raw data                           | ....S17 |
| 4. Computational details and molecular modeling  | ....S18 |
| 5. Archive for HF/6-31G(d) computational results | ....S21 |
| 6. References                                    | ....S31 |

## 1. Synthetic and analytical details

$^1\text{H}$  NMR spectra were obtained at 400 MHz for all compounds in acetone- $d_6$  ( $\delta$  2.04 ppm) or  $\text{CDCl}_3$  ( $\delta$  7.26 ppm).  $^{11}\text{B}$  NMR spectra were recorded at 128 MHz. Chemical shifts were referenced to the solvent ( $^1\text{H}$ ) or to an external sample of  $\text{B}(\text{OH})_3$  in MeOH ( $^{11}\text{B}$ ,  $\delta$  = 18.1 ppm). The preparation and characterization details of *N*-butyl-4-heptyloxyppyridinium bromide (**[Pyr]Br**),<sup>1</sup> phenols **5a**,<sup>2</sup> **5b**,<sup>3</sup> **5c**,<sup>4</sup> **5d**,<sup>5</sup> **5e**,<sup>6</sup> and **5h**,<sup>7</sup> and also ion pairs **1a[Pyr]**–**1c[Pyr]**<sup>1</sup> were reported previously.

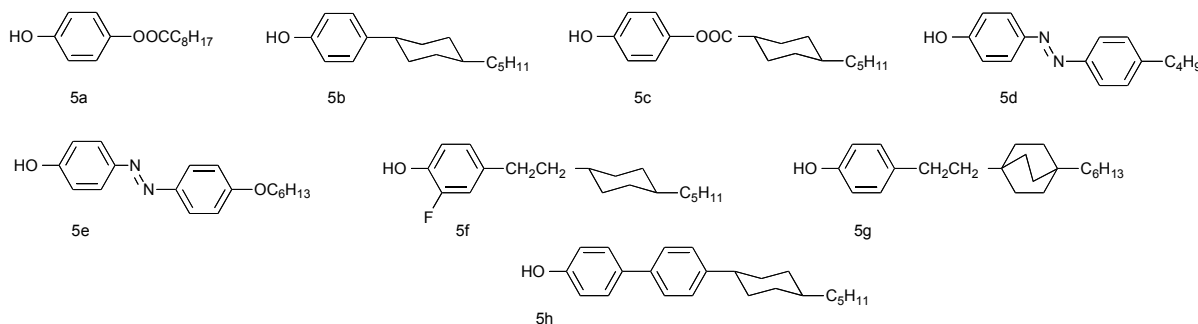

### General Procedure for Preparation of Esters **1** and **2**

Phenol **5** (1.5 equivalents) was added to a colorless solution of acid [*closo*-1- $\text{CB}_9\text{H}_8$ -1-COOH-10- $\text{C}_6\text{H}_{13}$ ]<sup>-</sup> [ $\text{NMe}_4$ ]<sup>+</sup> (**3[NMe<sub>4</sub>]**) or [*closo*-1- $\text{CB}_{11}\text{H}_{10}$ -1-COOH-12- $\text{C}_6\text{H}_{13}$ ]<sup>-</sup> [ $\text{NEt}_4$ ]<sup>+</sup> (**4[NEt<sub>4</sub>]**), DCC (1.0 equivalent), and DMAP (0.1 equivalents) in anhydrous  $\text{CH}_2\text{Cl}_2$ . The reaction mixture was stirred overnight at rt, and the reaction progress was monitored by TLC ( $R_f$  = 0.5,  $\text{CH}_3\text{CN}/\text{CH}_2\text{Cl}_2$ , 1:9). The solvent was removed *in vacuo*, and the crude product was isolated by column chromatography ( $\text{SiO}_2$ ,  $\text{CH}_3\text{CN}/\text{CH}_2\text{Cl}_2$ , 1:9). The resulting ester was washed with hot hexane and used in the subsequent step for cation exchange without further purification. Typical yields for this procedure are above 80 %.

*N*-Butyl-4-heptyloxypyridinium bromide ([**Pyr**]**Br**, 1.0 equivalent) or cetyltrimethylammonium bromide ([**Cetyl**]**Br**, 1.0 equivalent) were added to a solution of ester **1**[**NMe**<sub>4</sub>] or **2**[**NEt**<sub>4</sub>] in CH<sub>2</sub>Cl<sub>2</sub>. Water was added, and the biphasic system was stirred vigorously until all the precipitate had dissolved. The CH<sub>2</sub>Cl<sub>2</sub> layer was separated, and the aqueous layer was extracted with additional CH<sub>2</sub>Cl<sub>2</sub>. The CH<sub>2</sub>Cl<sub>2</sub> layers were combined, washed with H<sub>2</sub>O, dried (Na<sub>2</sub>SO<sub>4</sub>), and evaporated giving **1**[**Pyr**], **2**[**Pyr**] or **1**[**Cetyl**], **2**[**Cetyl**] as crystalline solids, which were further purified by recrystallization from aqueous alcohol. Some pyridinium salts were purified further by column chromatography (CH<sub>3</sub>CN/CH<sub>2</sub>Cl<sub>2</sub>, 1:9) and then by repeated recrystallization from aqueous alcohol. The resulting crystals were dried in vacuum at ambient temperature, and typical yields range from 20%-40% based on the starting hexyl acid **3**[**NMe**<sub>4</sub>] or **4**[**NEt**<sub>4</sub>].

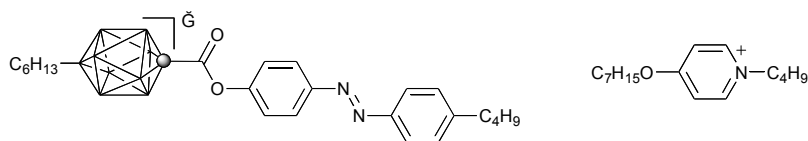

**1d**[**Pyr**]:

Recrystallized from EtOH/H<sub>2</sub>O mixtures (1x) and MeOH/H<sub>2</sub>O mixtures (7x) providing the pure salt as orange microcrystals: <sup>1</sup>H NMR (400 MHz, acetone-*d*<sub>6</sub>) δ 0.40-2.50 (m, 8H), 0.87 (t, *J* = 6.9 Hz, 3H), 0.92 (t, *J* = 7.1 Hz, 3H); 0.94 (t, *J* = 7.4 Hz, 3H), 0.95 (t, *J* = 7.4 Hz, 3H), 1.23-1.44 (m, 16H), 1.45-1.52 (m, 2H), 1.53-1.61 (m, 2H), 1.66 (quint, *J* = 7.6 Hz, 2H), 1.85-1.92 (m, 4H), 1.95-2.04 (m, 2H), 2.73 (t, *J* = 7.7 Hz, 2H), 4.46 (t, *J* = 6.5 Hz, 2H), 4.64 (t, *J* = 7.5 Hz, 2H), 7.42 (d, *J* = 8.4 Hz, 2H), 7.51 (d, *J* = 8.8 Hz, 2H), 7.67 (d, *J* = 7.6 Hz, 2H), 7.88 (d, *J* = 8.4 Hz, 2H), 8.03 (d, *J* = 8.8 Hz, 2H), 8.92 (d, *J* = 7.6 Hz, 2H); <sup>11</sup>B {<sup>1</sup>H} NMR (128 MHz, acetone-*d*<sub>6</sub>) δ -23.8 (4B), -15.8 (4B), 49.4 (1B). Anal. Calcd. for C<sub>40</sub>H<sub>66</sub>B<sub>9</sub>N<sub>3</sub>O<sub>3</sub>: C, 65.43; H, 9.06; N, 5.72. Found: C, 65.96; H, 9.02; N, 6.00.

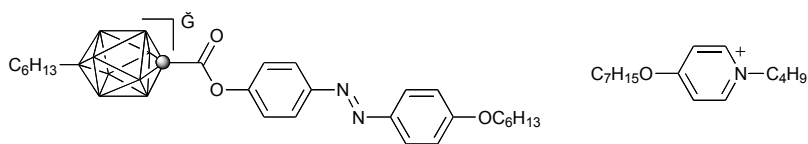

**1e[Pyr]:**

Recrystallized from EtOH/H<sub>2</sub>O mixtures (4x) providing the pure salt as orange microcrystals:

<sup>1</sup>H NMR (400 MHz, acetone-*d*<sub>6</sub>) δ 0.40-2.50 (m, 8H), 0.88 (t, *J* = 7.0 Hz, 3H), 0.92 (t, *J* = 7.0 Hz, 3H), 0.93 (t, *J* = 6.5 Hz, 3H), 0.96 (t, *J* = 7.4 Hz, 3H), 1.27-1.32 (m, 4H), 1.33-1.45 (m, 12H), 1.46-1.62 (m, 6H), 1.80-2.09 (m, 10H), 4.14 (t, *J* = 6.5 Hz, 2H), 4.47 (t, *J* = 6.5 Hz, 2H), 4.64 (t, *J* = 7.4 Hz, 2H), 7.12 (d, *J* = 9.0 Hz, 2H), 7.50 (d, *J* = 8.8 Hz, 2H), 7.68 (d, *J* = 7.4 Hz, 2H), 7.95 (d, *J* = 8.9 Hz, 2H), 8.01 (d, *J* = 8.8 Hz, 2H), 8.92 (d, *J* = 7.4 Hz, 2H); <sup>11</sup>B NMR (128 MHz, acetone-*d*<sub>6</sub>) δ -23.9 (d, *J* = 143 Hz, 4B), -15.9 (d, *J* = 139 Hz, 4B), 49.0 (1B). Anal. Calcd. for C<sub>42</sub>H<sub>70</sub>B<sub>9</sub>N<sub>3</sub>O<sub>4</sub>: C, 64.81; H, 9.07; N, 5.40. Found: C, 64.70; H, 9.11; N, 5.35.

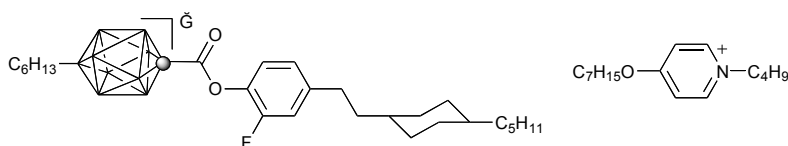

**1f[Pyr]:**

Recrystallized from MeOH/H<sub>2</sub>O mixtures (4x) providing the pure salt as white crystals: <sup>1</sup>H NMR (500 MHz, acetone-*d*<sub>6</sub>) δ 0.40-2.50 (m, 8H), 0.87 (t, *J* = 7.0 Hz, 6H), 0.91 (t, *J* = 7.1 Hz, 3H), 0.95 (t, *J* = 7.4 Hz, 3H), 0.96-1.03 (m, 2H), 1.15-1.20 (m, 2H), 1.21-1.33 (m, 12H), 1.34-1.44 (m, 8H), 1.45-1.51 (m, 2H), 1.52-1.59 (m, 4H), 1.77 (br d, *J* = 12.3 Hz, 2H), 1.82-1.98 (m, 8H), 1.99-2.04 (m, 4H), 2.68 (t, *J* = 8.1 Hz, 2H), 4.47 (t, *J* = 6.5 Hz, 2H), 4.64 (t, *J* = 7.5 Hz, 2H), 7.08 (d, *J* = 8.2 Hz, 1H), 7.13 (dd, *J*<sub>1</sub> = 11.5 Hz, *J*<sub>2</sub> = 1.8 Hz, 1H), 7.24 (t, *J* = 8.2 Hz, 1H), 7.68 (d, *J* = 7.5 Hz, 2H), 8.92 (d, *J* = 7.5 Hz, 2H); <sup>11</sup>B NMR (128 MHz, acetone-*d*<sub>6</sub>) δ -23.9 (d, *J*

= 140 Hz, 4B), -15.9 (d,  $J = 150$  Hz, 4B), 49.0 (s, 1B). Anal. Calcd. for  $C_{43}H_{77}B_9FNO_3$ : C, 66.87; H, 10.05; N, 1.81. Found: C, 67.06; H, 10.07; N, 1.89.

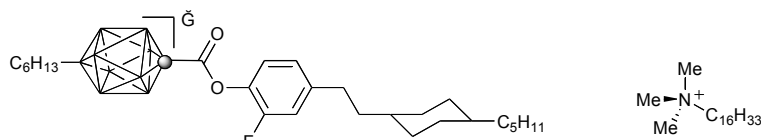

**1f[Cetyl]:**

Recrystallized from MeOH/H<sub>2</sub>O mixtures (4x) providing the pure salt as white crystals: <sup>1</sup>H NMR (400 MHz, acetone-*d*<sub>6</sub>)  $\delta$  0.40-2.50 (m, 8H), 0.87 (t,  $J = 7.0$  Hz, 3H), 0.88 (t,  $J = 6.8$  Hz, 3H), 0.92 (t,  $J = 7.0$  Hz, 3H), 0.96-1.03 (m, 2H), 1.15-1.43 (m, 42H), 1.52-1.61 (m, 4H), 1.78 (br d,  $J = 12.6$  Hz, 2H), 1.83-2.00 (m, 8H), 2.69 (t,  $J = 8.1$  Hz, 2H), 3.37 (s, 9H), 3.54-3.60 (m, 2H), 7.09 (d,  $J = 8.3$  Hz, 1H), 7.14 (dd,  $J_1 = 11.5$  Hz,  $J_2 = 1.9$  Hz, 1H), 7.25 (t,  $J = 8.1$  Hz, 1H); <sup>11</sup>B NMR (128 MHz, acetone-*d*<sub>6</sub>)  $\delta$  -23.9 (d,  $J = 135$  Hz, 4B), -15.9 (d,  $J = 150$  Hz, 4B), 49.3 (s, 1B). Anal. Calcd. for  $C_{46}H_{91}B_9FNO_2$ : C, 68.50; H, 11.37; N, 1.74. Found: C, 68.92; H, 11.24; N, 1.86.

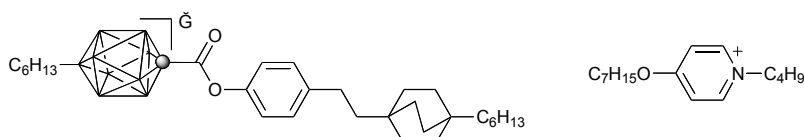

**1g[Pyr]:**

Recrystallized from MeOH/H<sub>2</sub>O mixtures (4x) providing the pure salt as white crystals: <sup>1</sup>H NMR (500 MHz, acetone-*d*<sub>6</sub>)  $\delta$  0.40-2.50 (m, 8H), 0.87 (t,  $J = 7.0$  Hz, 6H), 0.91 (t,  $J = 7.1$  Hz, 3H), 0.95 (t,  $J = 7.4$  Hz, 3H), 1.06-1.10 (m, 2H), 1.18-1.51 (m, 36H), 1.56 (quint,  $J = 7.2$  Hz, 2H), 1.84-1.96 (m, 6H), 1.98-2.04 (m, 2H), 2.52-2.57 (m, 2H), 4.46 (t,  $J = 6.5$  Hz, 2H), 4.63 (t,  $J = 7.5$  Hz, 2H), 7.15 (d,  $J = 8.5$  Hz, 2H), 7.24 (d,  $J = 8.5$  Hz, 2H), 7.67 (d,  $J = 7.5$  Hz, 2H), 8.91 (d,  $J = 7.5$  Hz, 2H); <sup>11</sup>B NMR (128 MHz, acetone-*d*<sub>6</sub>)  $\delta$  -23.9 (d,  $J = 139$  Hz, 4B), -16.0 (d,

$J = 152$  Hz, 4B), 49.0 (s, 1B). Anal. Calcd. for  $C_{46}H_{82}B_9NO_3$ : C, 69.54; H, 10.40; N, 1.76.  
Found: C, 69.68; H, 10.21; N, 1.87.

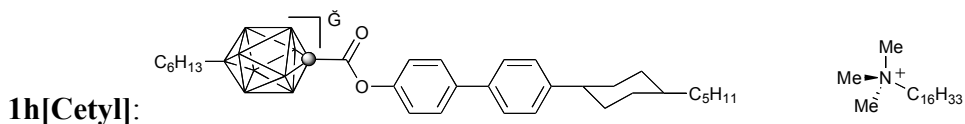

Due to low solubility of **1h[NMe<sub>4</sub>]** salt it was converted directly to **1h[Cetyl]** and purified chromatographically. Product was recrystallized from EtOH (3x) providing the pure salt **1h[Cetyl]** as a white wax: <sup>1</sup>H NMR (400 MHz, acetone-*d*<sub>6</sub>) δ 0.40-2.50 (m, 8H), 0.88 (t,  $J = 7.0$  Hz, 3H), 0.91 (t,  $J = 7.0$  Hz, 3H), 0.93 (t,  $J = 7.1$  Hz, 3H), 1.00-1.17 (m, 3H), 1.22-1.45 (m, 46H), 1.50-1.62 (m, 2H), 1.87-2.00 (m, 4H), 2.52 (tt,  $J_1 = 12.2$  Hz,  $J_2 = 3.0$  Hz, 1H), 3.35 (s, 9H), 3.53-3.60 (m, 2H), 7.34 (d,  $J = 8.4$  Hz, 2H), 7.37 (d,  $J = 8.7$  Hz, 2H), 7.62 (d,  $J = 8.2$  Hz, 2H), 7.73 (d,  $J = 8.6$  Hz, 2H); <sup>11</sup>B NMR (128 MHz, acetone-*d*<sub>6</sub>) δ -23.9 (d,  $J = 137$  Hz, 4B), -16.0 (d,  $J = 151$  Hz, 5B), 49.0 (s, 1B). Anal. Calcd. for  $C_{50}H_{92}B_9NO_2$ : C, 71.79; H, 11.08; N, 1.67. Found: C, 72.00; H, 11.15; N, 1.92.

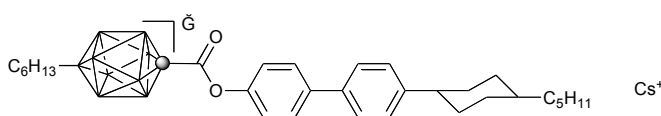

**Preparation of 1h[Cs].** Purified salt **1h[NMe<sub>4</sub>]** (75 mg, 0.12 mmol) was suspended in 10% HCl (20 mL), Et<sub>2</sub>O (50 mL) was added and the mixture was stirred until precipitation had dissolved (0.5 h). The Et<sub>2</sub>O layer was separated, washed with water and a solution of CsCl (2 mL, ~5.7 M) was added followed by H<sub>2</sub>O (2 mL) and CH<sub>2</sub>Cl<sub>2</sub> (10 mL). The mixture was stirred for 15 min, Et<sub>2</sub>O was evaporated, and CH<sub>2</sub>Cl<sub>2</sub> added. After short stirring, the organic layer was separated the aqueous layer extracted (CH<sub>2</sub>Cl<sub>2</sub>), extracts dried (NaSO<sub>4</sub>), and the solvent

evaporated leaving 70 mg (86% yield) of cesium salt **1h**[Cs] as a white solid. Analytically pure sample was obtained by recrystallization from toluene containing small amounts of MeCN: mp >290 °C dec;  $^1\text{H}$  NMR (400 MHz, acetone- $d_6$ )  $\delta$  0.40-2.50 (m, 8H), 0.88 (t,  $J = 7.0$  Hz, 3H), 0.90 (t,  $J = 7.2$  Hz, 3H), 1.00-1.14 (m, 3H), 1.20-1.43 (m, 12H), 1.44-1.58 (m, 4H), 1.82-1.97 (m, 8H), 2.09 (s, 3H, MeCN), 2.53 (tt,  $J_1 = 12.2$  Hz,  $J_2 = 2.9$  Hz, 1H), 7.33 (d,  $J = 8.2$  Hz, 2H), 7.35 (d,  $J = 8.6$  Hz, 2H), 7.60 (d,  $J = 8.2$  Hz, 2H), 7.70 (d,  $J = 8.8$  Hz, 2H);  $^{11}\text{B}$  NMR (128 MHz, acetone- $d_6$ )  $\delta$  -23.7 (d,  $J = 135$  Hz, 4B), -16.1 (d,  $J = 143$  Hz, 4B), 49.0 (s, 1B). Anal. Calcd. For  $\text{C}_{31}\text{H}_{50}\text{B}_9\text{CsO}_2$ : C, 54.36; H, 7.36; calcd for  $\text{C}_{31}\text{H}_{50}\text{B}_9\text{CsO}_2 \cdot \text{MeCN}$ : C, 54.60; H, 7.36; N, 1.93. Found: C, 54.81; H, 7.26; N, 1.83.

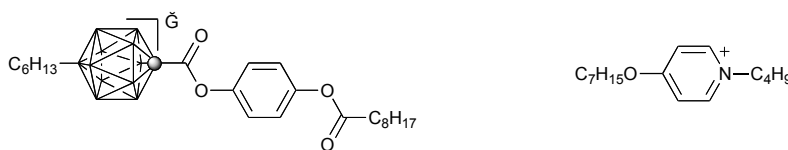

**2a**[Pyr]:

Recrystallized from MeOH/ $\text{H}_2\text{O}$  mixtures (3x) providing the pure salt as white flakes:  $^1\text{H}$  NMR (400 MHz, acetone- $d_6$ )  $\delta$  0.50-2.50 (m, 10H), 0.53-0.59 (m, 2H), 0.85 (t,  $J = 7.1$  Hz, 3H), 0.87 (t,  $J = 6.9$  Hz, 6H), 0.95 (t,  $J = 7.4$  Hz, 3H), 1.26-1.44 (m, 26H), 1.45-1.53 (m, 2H), 1.70 (quint,  $J = 7.4$  Hz, 2H), 1.89 (quint,  $J = 7.0$  Hz, 2H), 1.98-2.06 (m, 2H), 2.55 (t,  $J = 7.4$  Hz, 2H), 4.47 (t,  $J = 6.5$  Hz, 2H), 4.64 (t,  $J = 7.5$  Hz, 2H), 7.01 (d,  $J = 9.0$  Hz, 2H), 7.10 (d,  $J = 9.0$  Hz, 2H), 7.68 (d,  $J = 7.6$  Hz, 2H), 8.92 (d,  $J = 7.6$  Hz, 2H);  $^{11}\text{B}$  NMR (128 MHz, acetone- $d_6$ )  $\delta$  -14.1 (d,  $J = 157$  Hz, 5B), -12.0 (d,  $J = 137$  Hz, 5B), 5.1 (s, 1B). Anal. Calcd. for  $\text{C}_{39}\text{H}_{72}\text{B}_{11}\text{NO}_5$ : C, 62.13; H, 9.63; N, 1.86. Found: C, 62.40; H, 9.63; N, 1.81.

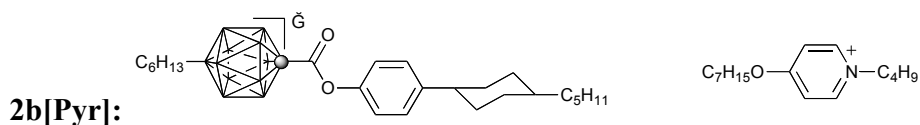

Recrystallized from EtOH/H<sub>2</sub>O mixtures (3x) providing the pure salt as white crystals: <sup>1</sup>H NMR (400 MHz, acetone-*d*<sub>6</sub>) δ 0.40-2.50 (m, 10H), 0.53-0.59 (m, 2H), 0.86 (t, *J* = 7.1 Hz, 3H), 0.88 (t, *J* = 6.9 Hz, 3H), 0.89 (t, *J* = 6.8 Hz, 3H), 0.96 (t, *J* = 7.4 Hz, 3H), 0.96-1.06 (m, 3H), 1.20-1.54 (m, 28H), 1.80-1.94 (m, 8H), 2.40 (tt, *J*<sub>1</sub> = 12.3 Hz, *J*<sub>2</sub> = 3.2 Hz, 1H), 4.48 (t, *J* = 6.5 Hz, 2H), 4.65 (t, *J* = 7.5 Hz, 2H), 6.88 (d, *J* = 8.5 Hz, 2H), 7.21 (d, *J* = 8.5 Hz, 2H), 7.69 (d, *J* = 7.3 Hz, 2H), 8.93 (d, *J* = 7.3 Hz, 2H); <sup>11</sup>B NMR (128 MHz, acetone-*d*<sub>6</sub>) δ -14.0 (d, *J* = 157 Hz, 5B), -12.0 (d, *J* = 137 Hz, 5B), 5.0 (s, 1B).

<sup>1</sup>H NMR (400 MHz, CDCl<sub>3</sub>) δ 0.40-2.50 (m, 10H), 0.53-0.61 (m, 2H), 0.82 (t, *J* = 7.0 Hz, 3H), 0.87 (t, *J* = 7.2 Hz, 3H), 0.88 (t, *J* = 7.0 Hz, 3H), 0.92 (t, *J* = 7.3 Hz, 3H), 0.96-1.06 (m, 3H), 1.16-1.46 (m, 28H), 1.78-1.92 (m, 8H), 2.40 (br t, *J* = 12.2 Hz, 1H), 4.23 (t, *J* = 6.5 Hz, 2H), 4.30 (t, *J* = 7.5 Hz, 2H), 6.89 (d, *J* = 8.5 Hz, 2H), 7.11 (d, *J* = 8.6 Hz, 2H), 7.30 (d, *J* = 7.1 Hz, 2H), 8.37 (d, *J* = 7.1 Hz, 2H). Anal. Calcd. for C<sub>41</sub>H<sub>76</sub>B<sub>11</sub>NO<sub>3</sub>: C, 65.66; H, 10.21; N, 1.87. Found: C, 65.46; H, 10.40; N, 1.81.

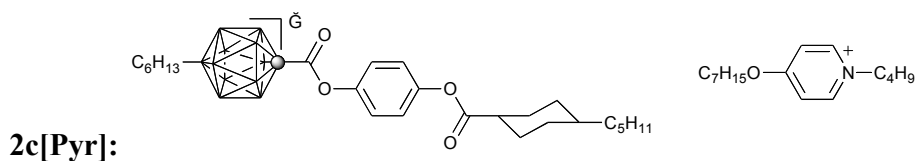

Recrystallized from EtOH/H<sub>2</sub>O mixtures (3x) providing the pure salt as white crystals: <sup>1</sup>H NMR (400 MHz, acetone-*d*<sub>6</sub>) δ 0.40-2.50 (m, 10H), 0.52-0.59 (m, 2H), 0.85 (t, *J* = 7.1 Hz, 3H), 0.87 (t, *J* = 7.0 Hz, 3H), 0.88 (t, *J* = 6.8 Hz, 3H), 0.95 (t, *J* = 7.4 Hz, 3H), 0.98-1.07 (m, 1H), 1.17-1.56 (m, 32H), 1.82-1.93 (m, 4H), 1.98-2.13 (m, 2H), 2.48 (tt, *J*<sub>1</sub> = 12.2 Hz, *J*<sub>2</sub> = 3.6 Hz, 1H),



4.47 (t,  $J = 6.5$  Hz, 2H), 4.64 (t,  $J = 7.5$  Hz, 2H), 7.00 (d,  $J = 9.0$  Hz, 2H), 7.09 (d,  $J = 9.0$  Hz, 2H), 7.68 (d,  $J = 7.6$  Hz, 2H), 8.92 (d,  $J = 7.5$  Hz, 2H);  $^{11}\text{B}$  NMR (128 MHz, acetone- $d_6$ )  $\delta$  -14.1 (d,  $J = 152$  Hz, 5B), -12.0 (d,  $J = 140$  Hz, 5B), 5.9 (s, 1B). Anal. Calcd. for  $\text{C}_{42}\text{H}_{76}\text{B}_{11}\text{NO}_5$ : C, 63.53; H, 9.65; N, 1.76. Found: C, 63.79; H, 9.69; N, 1.70.

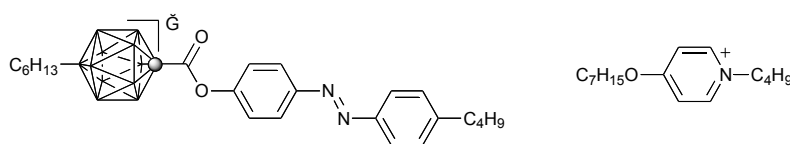

**2d[Pyrr]:**

Recrystallized from an EtOH/H<sub>2</sub>O mixture (1x) and MeOH/H<sub>2</sub>O mixtures (3x) providing the pure salt as orange crystals:  $^1\text{H}$  NMR (400 MHz, acetone- $d_6$ )  $\delta$  0.40-2.50 (m, 10H), 0.53-0.60 (m, 2H), 0.85 (t,  $J = 7.1$  Hz, 3H), 0.87 (t,  $J = 7.0$  Hz, 3H), 0.93 (t,  $J = 7.3$  Hz, 3H), 0.95 (t,  $J = 7.3$  Hz, 3H), 1.18-1.52 (m, 18H), 1.59-1.68 (m, 4H), 1.89 (quint,  $J = 7.0$  Hz, 2H), 1.97-2.07 (m, 2H), 2.71 (t,  $J = 7.7$  Hz, 2H), 4.46 (t,  $J = 6.5$  Hz, 2H), 4.64 (t,  $J = 7.5$  Hz, 2H), 7.20 (d,  $J = 8.9$  Hz, 2H), 7.40 (d,  $J = 8.4$  Hz, 2H), 7.67 (d,  $J = 7.5$  Hz, 2H), 7.84 (d,  $J = 8.4$  Hz, 2H), 7.93 (d,  $J = 8.9$  Hz, 2H), 8.92 (d,  $J = 7.6$  Hz, 2H);  $^{11}\text{B}$  NMR (128 MHz, acetone- $d_6$ )  $\delta$  -14.0 (d,  $J = 158$  Hz, 5B), -11.9 (d,  $J = 139$  Hz, 5B), 5.7 (s, 1B). Anal. Calcd. for  $\text{C}_{40}\text{H}_{68}\text{B}_{11}\text{N}_3\text{O}_3$ : C, 63.39; H, 9.04; N, 5.54. Found: C, 63.73; H, 9.14; N, 5.87.

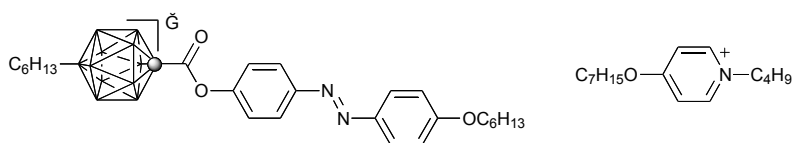

**2e[Pyrr]:**

Recrystallized from an EtOH providing the pure salt as orange crystals:  $^1\text{H}$  NMR (400 MHz, acetone- $d_6$ )  $\delta$  0.40-2.50 (m, 10H), 0.52-0.61 (m, 2H), 0.86 (t,  $J = 7.3$  Hz, 3H), 0.88 (t,  $J = 7.2$  Hz, 3H), 0.91 (t,  $J = 7.0$  Hz, 3H), 0.96 (t,  $J = 7.4$  Hz, 3H), 1.19-1.27 (m, 6H), 1.28-1.34 (m,

4H), 1.35-1.45 (m, 6H), 1.46-1.55 (m, 4H), 1.82 (quint,  $J = 7.1$  Hz, 4H), 1.90 (quint,  $J = 7.0$  Hz, 4H), 1.99-2.09 (m, 2H), 4.12 (t,  $J = 6.5$  Hz, 2H), 4.47 (t,  $J = 6.5$  Hz, 2H), 4.65 (t,  $J = 7.4$  Hz, 2H), 7.10 (d,  $J = 9.0$  Hz, 2H), 7.19 (d,  $J = 8.8$  Hz, 2H), 7.69 (d,  $J = 7.5$  Hz, 2H), 7.90 (d,  $J = 8.8$  Hz, 2H), 7.91 (d,  $J = 9.0$  Hz, 2H), 8.93 (d,  $J = 7.5$  Hz, 2H);  $^{11}\text{B}$  NMR (128 MHz, acetone- $d_6$ )  $\delta$  -14.0 (d,  $J = 154$  Hz, 5B), -11.9 (d,  $J = 138$  Hz, 5B), 5.0 (s, 1B). Anal. Calcd. for  $\text{C}_{42}\text{H}_{72}\text{B}_{11}\text{N}_3\text{O}_4$ : C, 62.90; H, 9.05; N, 5.24. Found: C, 63.13; H, 9.03; N, 5.18.

After a solution of **2e**[Pyr] in acetone- $d_6$  was exposed to intense fluorescent tube light for 1 hr,  $^1\text{H}$  NMR spectrum showed new distinct signals ascribed to the *cis* isomer: 6.96 (d,  $J = 8.8$  Hz, 2H), 6.84-6.88 (m, 6H), 3.96 (t,  $J = 6.5$  Hz, 2H), 1.73 (quint,  $J = 7.1$  Hz, 4H).

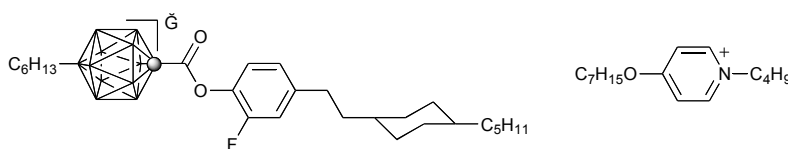

**2f**[Pyr]:

Recrystallized from MeOH/ $\text{H}_2\text{O}$  mixtures (4x) providing the pure salt as white crystals:  $^1\text{H}$  NMR (400 MHz, acetone- $d_6$ )  $\delta$  0.40-2.50 (m, 10H), 0.52-0.58 (m, 2H), 0.85 (t,  $J = 7.2$  Hz, 3H), 0.86 (t,  $J = 6.9$  Hz, 3H), 0.87 (t,  $J = 7.0$  Hz, 3H), 0.98-0.99 (m, 4H), 0.95 (t,  $J = 7.4$  Hz, 3H), 1.12-1.52 (m, 30H), 1.74 (br d,  $J = 11.1$  Hz, 2H), 1.80 (br d,  $J = 11.8$  Hz, 2H), 1.89 (quint,  $J = 7.1$  Hz, 2H), 1.98-2.08 (m, 2H), 2.61 (t,  $J = 8.1$  Hz, 2H), 4.47 (t,  $J = 6.5$  Hz, 2H), 4.65 (t,  $J = 7.4$  Hz, 2H), 6.94 (t,  $J = 7.8$  Hz, 1H), 6.98 (dd,  $J_1 = 10.4$  Hz,  $J_2 = 1.8$  Hz, 1H), 7.02 (dd,  $J_1 = 11.4$  Hz,  $J_2 = 1.6$  Hz, 1H), 7.68 (d,  $J = 7.5$  Hz, 2H), 8.93 (d,  $J = 7.5$  Hz, 2H);  $^{11}\text{B}$  NMR (128 MHz, acetone- $d_6$ )  $\delta$  -14.0 (d,  $J = 157$  Hz, 5B), -11.9 (d,  $J = 141$  Hz, 5B), 5.4 (s, 1B). Anal. Calcd. for  $\text{C}_{43}\text{H}_{79}\text{B}_{11}\text{FNO}_3$ : C, 64.88; H, 10.00; N, 1.76. Found: C, 65.06; H, 10.05; N, 1.82.

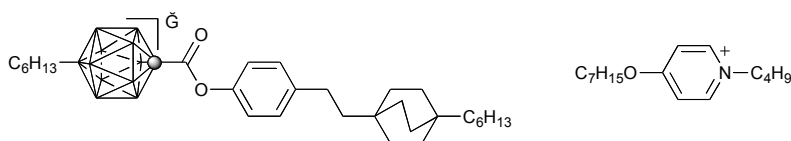

**2g[Pyr]:**

Recrystallized from EtOH/H<sub>2</sub>O mixtures (2x) and MeOH/H<sub>2</sub>O mixtures (2x) providing the pure salt as white flakes: <sup>1</sup>H NMR (400 MHz, acetone-*d*<sub>6</sub>) δ 0.40-2.50 (m, 10H), 0.52-0.58 (m, 2H), 0.85 (t, *J* = 7.2 Hz, 3H), 0.87 (t, *J* = 7.1 Hz, 3H), 0.88 (t, *J* = 6.9 Hz, 3H), 0.95 (t, *J* = 7.4 Hz, 3H), 1.04-1.08 (m, 2H), 1.16-1.46 (m, 38H), 1.49 (quint, *J* = 7.3 Hz, 2H), 1.89 (quint, *J* = 7.1 Hz, 2H), 1.99-2.06 (m, 2H), 2.45-2.50 (m, 2H), 4.47 (t, *J* = 6.5 Hz, 2H), 4.64 (t, *J* = 7.5 Hz, 2H), 6.85 (d, *J* = 8.5 Hz, 2H), 7.14 (d, *J* = 8.5 Hz, 2H), 7.68 (d, *J* = 7.4 Hz, 2H), 8.92 (d, *J* = 7.4 Hz, 2H); <sup>11</sup>B NMR (128 MHz, acetone-*d*<sub>6</sub>) δ -14.1 (d, *J* = 154 Hz, 5B), -12.0 (d, *J* = 137 Hz, 5B), 5.1 (s, 1B). Anal. Calcd. for C<sub>46</sub>H<sub>84</sub>B<sub>11</sub>NO<sub>3</sub>: C, 67.53; H, 10.35; N, 1.71. Found: C, 67.76; H, 10.44; N, 1.88.

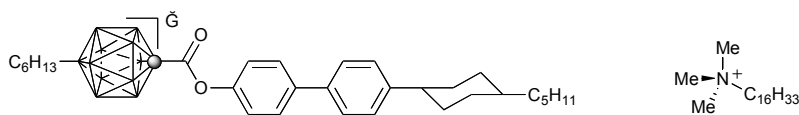

**2h[Cetyl]:**

Recrystallized from MeOH (1x) and EtOH (2x) providing the pure salt as a white powder: <sup>1</sup>H NMR (400 MHz, acetone-*d*<sub>6</sub>) δ 0.40-2.50 (m, 10H), 0.50-0.60 (m, 2H), 0.83-0.91 (m, 9H), 1.03-1.14 (m, 3H), 1.15-1.45 (m, 44H), 1.46-1.57 (m, 2H), 1.85-2.01 (m, 4H), 2.52 (br t, *J* = 12.2 Hz, 1H), 3.34-3.37 (m, 9H), 3.53-3.60 (m, 2H), 7.05 (d, *J* = 8.6 Hz, 2H), 7.30 (d, *J* = 8.2 Hz, 2H), 7.54 (d, *J* = 8.2 Hz, 2H), 7.61 (d, *J* = 8.5 Hz, 2H); <sup>11</sup>B NMR (128 MHz, acetone-*d*<sub>6</sub>) δ -14.0 (d, *J* = 158 Hz, 5B), -11.9 (d, *J* = 138 Hz, 5B), 5.0 (s, 1B). Anal. Calcd. for C<sub>50</sub>H<sub>94</sub>B<sub>11</sub>NO<sub>2</sub>: C, 69.81; H, 11.01; N, 1.63. Found: C, 70.00; H, 10.82; N, 1.73.

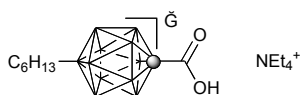

### Preparation of [closo-1-CB<sub>11</sub>H<sub>10</sub>-1-COOH-12-C<sub>6</sub>H<sub>13</sub>]<sup>-</sup> [NEt<sub>4</sub>]<sup>+</sup> (4[NEt<sub>4</sub>]).

A solution of anhydrous ZnCl<sub>2</sub> (5.84 g, 42.8 mmol) in anhydrous THF (30 mL) under Ar was treated with C<sub>6</sub>H<sub>13</sub>MgBr (21.5 mL, 40.8 mmol, 1.9 M in Et<sub>2</sub>O) at 0 °C forming a white, thick slurry which was stirred for 15 min. Anhydrous NMP (15 mL), Pd<sub>2</sub>(dba)<sub>3</sub> (0.062 g, 2 mol %), and [HPCy<sub>3</sub>]<sup>+</sup> [BF<sub>4</sub>]<sup>-</sup> (0.100 g, 8 mol %) were added and the reaction mixture turned dark green but slowly faded to red/orange. After 5 mins, [closo-1-CB<sub>11</sub>H<sub>10</sub>-1-COOH-12-I]<sup>-</sup> [NEt<sub>4</sub>]<sup>+</sup> (6[NEt<sub>4</sub>], 1.50 g, 3.40 mmol) was added, and the reaction mixture was refluxed at 90 °C for 24 hr. <sup>11</sup>B NMR of a small aliquot (quenched in sat. [NH<sub>4</sub>]<sup>+</sup>Cl<sup>-</sup> and extracted into ether) showed complete conversion to product. Sat. [NH<sub>4</sub>]<sup>+</sup>Cl<sup>-</sup> (50 mL) was added, excess THF was removed, and the remaining aqueous layer was extracted with Et<sub>2</sub>O (3 x 20 mL). The organic layers were combined, dried (Na<sub>2</sub>SO<sub>4</sub>), and removed giving a black sludge. Excess NMP and 1-hexanol were removed under vacuum (60 °C, 0.5 mm Hg) and the residue was separated by column chromatography (SiO<sub>2</sub>, CH<sub>3</sub>CN/CH<sub>2</sub>Cl<sub>2</sub>, 1:9).

The crude acid extract was re-dissolved in 10 % HCl (50 mL) and extracted with Et<sub>2</sub>O (3 x 20 mL). The organic layers were combined, and water (10 mL) was added. The Et<sub>2</sub>O was removed *in vacuo*, and the aqueous layer was filtered. [NEt<sub>4</sub>]<sup>+</sup> Br<sup>-</sup> (0.790 g, 3.73 mmol) was added to the filtrate, and the resulting precipitate formed was filtered, washed (H<sub>2</sub>O), and dried *in vacuo* giving 0.830 g (61% yield) of 4[NEt<sub>4</sub>] as a light yellow crystalline solid. Further purification was achieved by recrystallization from aqueous CH<sub>3</sub>OH: mp 122-124 °C; <sup>1</sup>H NMR (400 MHz, CD<sub>3</sub>CN) δ 0.40-2.50 (m, 10H), 0.46 (br t, *J* = 8.9 Hz, 2H), 0.85 (t, *J* = 7.0 Hz, 3H), 1.20 (tt, *J*<sub>1</sub> = 7.3 Hz, *J*<sub>2</sub> = 1.9 Hz, 12H), 1.07-1.29 (m, 8H), 3.15 (q, *J* = 7.3 Hz, 8H), 8.81 (br s, 1H); <sup>11</sup>B NMR (128 MHz, CD<sub>3</sub>CN) δ -14.3 (d, *J* = 155 Hz, 5H), -12.2 (d, *J* = 137 Hz, 5B), 4.6

(s, 1H). Anal. Calcd. for  $C_{16}H_{44}B_{11}NO_2$ : C, 47.87; H, 11.05; N, 3.49. Found: C, 48.38; H, 11.25; N, 3.55.

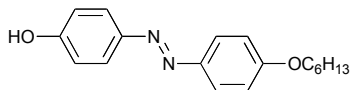

**4-(4-Hexyloxyphenylazo)phenol (5e).** <sup>6</sup> Mp 105-106 °C; <sup>1</sup>H NMR (400 MHz, CDCl<sub>3</sub>) δ 0.92 (t, *J* = 7.0 Hz, 3H), 1.32-1.39 (m, 4H), 1.45-1.54 (m, 2H), 1.82 (quint, *J* = 7.0 Hz, 2H), 4.04 (t, *J* = 6.6 Hz, 2H), 5.1 (s, 1H), 6.93 (d, *J* = 8.8 Hz, 2H), 6.99 (d, *J* = 8.9 Hz, 2H), 7.83 (d, *J* = 8.8 Hz, 2H), 7.85 (d, *J* = 9.0 Hz, 2H).

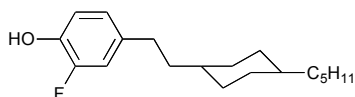

**2-Fluoro-4-(2-(4-pentylcyclohexyl)ethyl)phenol (5f).** Mp 72-73 °C; <sup>1</sup>H NMR (400 MHz, CDCl<sub>3</sub>) δ 0.88 (t, *J* = 7.2 Hz, 3H), 0.82-0.99 (m, 4H), 1.12-1.35 (m, 10H), 1.42-1.49 (m, 2H), 1.75 (br t, *J* = 11.5 Hz, 4H), 2.54 (t, *J* = 8.1 Hz, 2H), 4.88 (d, *J* = 3.8 Hz, 1H), 6.82 (dd, *J*<sub>1</sub> = 8.3 Hz, *J*<sub>2</sub> = 1.8 Hz, 1H), 6.86 (t, *J* = 11.4 Hz, 1H), 6.89 (dd, *J*<sub>1</sub> = 11.9 Hz, *J*<sub>2</sub> = 1.9 Hz, 1H). Anal. Calcd. for  $C_{19}H_{29}FO$ : C, 78.04; H, 10.00. Found: C, 78.33; H, 9.89.

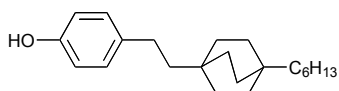

**4-(2-(4-Hexylbicyclo[2.2.2]-1-octyl)ethyl)phenol (5g).** Mp 103-104 °C; <sup>1</sup>H NMR (400 MHz, CDCl<sub>3</sub>) δ 0.88 (t, *J* = 6.8 Hz, 3H), 1.04-1.08 (m, 2H), 1.15-1.45 (m, 22H), 2.40-2.46 (m, 2H), 4.49 (s, 1H), 6.72 (d, *J* = 8.3 Hz, 2H), 7.02 (d, *J* = 8.3 Hz, 2H). Anal. Calcd. for  $C_{22}H_{34}O$ : C, 84.02; H, 10.90. Found: C, 83.48; H, 9.96.

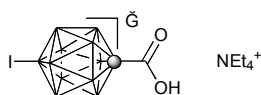

### Preparation of [closo-1-CB<sub>11</sub>H<sub>10</sub>-1-COOH-12-I]<sup>-</sup> [NEt<sub>4</sub>]<sup>+</sup> (6[NEt<sub>4</sub>]).

A solution of dried [closo-1-CB<sub>11</sub>H<sub>11</sub>-12-I]<sup>-</sup> Cs<sup>+</sup> (**7**[Cs], 1.67 g, 4.15 mmol) in anhydrous THF (20 mL) in a three-necked flask at -78 °C under Ar was treated with freshly distilled TMEDA (0.80 mL, 5.90 mmol) followed by dropwise addition of *n*-BuLi (2.90 mL, 5.80 mmol) over 30 min. The reaction mixture was slowly warmed to 0 °C (addition of THF may be necessary) and stirred for 1.5 hr. Dry CO<sub>2</sub> gas was bubbled through the solution for 40 mins, and the mixture became significantly more homogeneous. Water (30 mL) was added, and the volatiles evaporated. Insoluble material was removed by filtration, the filtrate washed with Et<sub>2</sub>O (3 x 20 mL); the Et<sub>2</sub>O layers were evaporated leaving a yellowish oil. The aqueous layer was acidified with 10 % HCl, extracted with Et<sub>2</sub>O (3 x 20 mL), and the organics layers combined. Water (25 mL) was added, and the Et<sub>2</sub>O removed. The aqueous layer was filtered, and [NEt<sub>4</sub>]<sup>+</sup> Br<sup>-</sup> (1.10 g, 5.23 mmol) was added producing a white precipitate. The solid was collected by filtration, washed with water, and dried giving typically 1.20–138 g (65–75% yield) of **6**[NEt<sub>4</sub>] as a white crystalline solid. An analytical sample of **6**[NEt<sub>4</sub>] was prepared by recrystallization from water containing with a few drops of EtOH: <sup>1</sup>H NMR (400 MHz, acetone-*d*<sub>6</sub>) δ 0.50–2.50 (m, 10H), 1.40 (tt, *J*<sub>1</sub> = 7.3 Hz, *J*<sub>2</sub> = 1.9 Hz, 12H), 3.50 (q, *J* = 7.3 Hz, 8H), COOH was not observed; <sup>11</sup>B NMR (128 MHz, acetone-*d*<sub>6</sub>) δ -16.2 (s, 1B), -13.5 (d, *J* = 155 Hz, 5B), -11.3 (d, *J* = 146 Hz, 5B). Anal. Calcd. for C<sub>10</sub>H<sub>31</sub>B<sub>11</sub>INO<sub>2</sub>: C, 27.10; H, 7.05; N, 3.16. Found: C, 27.02; H, 7.18; N, 3.18.

A similar result was obtained using [closo-1-CB<sub>11</sub>H<sub>11</sub>-12-I]<sup>-</sup> [NHMe<sub>3</sub>]<sup>+</sup> (**7**[NHMe<sub>3</sub>]) and doubled amounts of BuLi. Thus, *n*-BuLi (3.35 mL, 7.50 mmol) was added slowly to a stirred

solution of [*closo*-1-CB<sub>11</sub>H<sub>11</sub>-12-I]<sup>-</sup>[NHMe<sub>3</sub>]<sup>+</sup> (0.824 g, 2.51 mmol, dried over P<sub>2</sub>O<sub>5</sub>) in THF (5 mL) and TMEDA (0.57 mL) at -78 °C under N<sub>2</sub>. The reaction mixture was stirred for 40 min, the temperature was slowly raised to 0 °C, and CO<sub>2</sub> (g) was bubbled through for 30 min before quenching the reaction with methanol (10 mL). Volatiles were removed *in vacuo*. The resulting yellowish oil was dissolved in H<sub>2</sub>O (25 ml), and the solution was washed with Et<sub>2</sub>O (3 x 15 mL). The aqueous was checked to ensure basicity, then half the required [NEt<sub>4</sub>]<sup>+</sup>Br<sup>-</sup> (0.29 g, 1.38 mmol) was added and the solution filtered. The other half of [NEt<sub>4</sub>]<sup>+</sup>Br<sup>-</sup> (0.29 g, 1.38 mmol) was added and the solution was acidified with 20% HCl (10 mL). The precipitate was filtered to provide a white crystalline solid, 0.746 g (90 %), which was recrystallized from hot H<sub>2</sub>O (20 ml) with a few drops of EtOH, to yield 0.623 g (75%) of carboxylic acid **6**[NEt<sub>4</sub>].

#### Preparation of [*closo*-1-CB<sub>11</sub>H<sub>11</sub>-12-I]<sup>-</sup> [NHMe<sub>3</sub>]<sup>+</sup> (**7**[NHMe<sub>3</sub>])

Following the literature procedure,<sup>8</sup> [*closo*-1-CB<sub>11</sub>H<sub>12</sub>]<sup>-</sup>Cs<sup>+</sup> (2.85, 10.3 mmol), prepared from [*closo*-1-CB<sub>11</sub>H<sub>11</sub>-1-NMe<sub>3</sub>],<sup>9</sup> was extracted to Et<sub>2</sub>O (3 x 20 mL) from 10 % HCl (100 mL). The ether was evaporated, and the free acid residue was dissolved in glacial acetic acid (35 mL) and treated with molecular I<sub>2</sub> (5.1 g, 20 mmol). The reaction was stirred at rt 45-50 °C for 3-4 days, and the reaction progress was monitored by <sup>11</sup>B NMR. Most of the acetic acid was removed *in vacuo*, solid Na<sub>2</sub>SO<sub>3</sub> (1.0 g, 7.9 mmol) was added, followed by 10 % HCl (50 mL). The product was extracted to Et<sub>2</sub>O (3 x 20 mL), organic layers were combined, and solvent evaporated in the presence of H<sub>2</sub>O (30 mL). The aqueous layer was filtered, and the filtrate treated with [NHMe<sub>3</sub>]<sup>+</sup>Cl<sup>-</sup> (2.5 g, 11.9 mmol) to precipitate a white solid that was filtered and dried. Recrystallization from hot aqueous EtOH gave 3.10 g (75% yield) of pure **7**[NHMe<sub>3</sub>]. <sup>11</sup>B NMR data was consistent with the literature.<sup>8</sup>

## 2. Transition temperatures for binary mixtures

**Table S1.** Transition temperatures for binary mixtures of **d[Pyr]** in **2e[Pyr]**.

additive: **d[Pyr]**

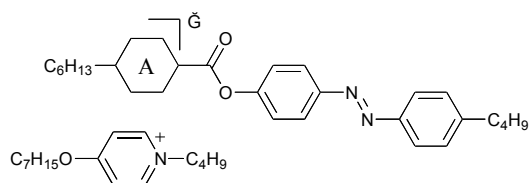

host: **2e[Pyr]**

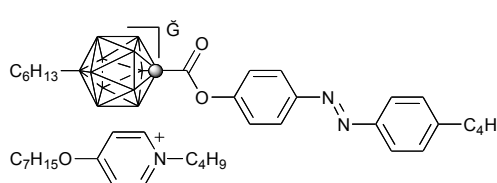

| A                  | Mol fraction $x$<br>in <b>2e[Pyr]</b> | T <sub>NI</sub> peak /°C | T <sub>SN</sub> peak /°C | Extrapolation to pure<br>$y = a + x \cdot T_{NI}$                                                        |
|--------------------|---------------------------------------|--------------------------|--------------------------|----------------------------------------------------------------------------------------------------------|
| <br><b>1d[Pyr]</b> | 0.000                                 | 144.3                    | 132.9                    | $y = 144.5 - 33.8 \cdot T_{NI}$<br>$R^2 = 0.997$<br><br>$y = 133.0 - 35.5 \cdot T_{SN}$<br>$R^2 = 0.997$ |
|                    | 0.0927                                | 141.4                    | 129.7                    |                                                                                                          |
|                    | 0.1998                                | 138.1                    | 126.2                    |                                                                                                          |
|                    | 0.2980                                | 134.1                    | 122.2                    |                                                                                                          |
| <br><b>2d[Pyr]</b> | 0.0000                                | 144.3                    | 132.85                   | $y = 144.5 - 22.2 \cdot T_{NI}$<br>$R^2 = 0.992$<br><br>$y = 132.9 - 36.6 \cdot T_{SN}$<br>$R^2 = 0.992$ |
|                    | 0.0994                                | 142.6                    | 129.7                    |                                                                                                          |
|                    | 0.2000                                | 139.8                    | 125.0                    |                                                                                                          |
|                    | 0.2972                                | 137.9                    | 122.30                   |                                                                                                          |

**1f[Pyr]** in diester **8**: 9.7 mol%

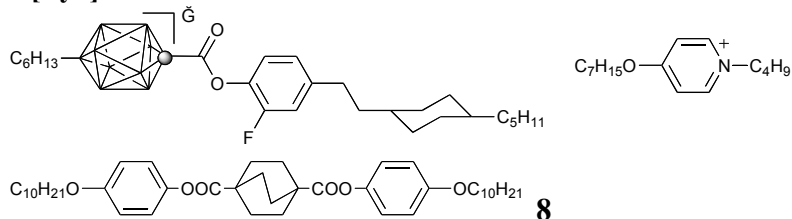

Pure components: SmA-I (peak):

Host (**8**): 175.3 °C  
 Additive (**1f[pyr]**): 150.4 °C  
 Mixture: 175.1 °C



### 3. Powder XRD raw data

**Table S2.** X-ray Diffraction Data.

| <b>1e[Pyr]</b>                                  |                     | <b>1f[Pyr]</b>                                   |                     | <b>2f[Pyr]</b>                                   |                     | <b>1g[Pyr]</b>                                   |                     | <b>2g[Pyr]</b>                                  |                     |
|-------------------------------------------------|---------------------|--------------------------------------------------|---------------------|--------------------------------------------------|---------------------|--------------------------------------------------|---------------------|-------------------------------------------------|---------------------|
| T /°C                                           | d <sub>001</sub> /Å | T /°C                                            | d <sub>001</sub> /Å | T /°C                                            | d <sub>001</sub> /Å | T /°C                                            | d <sub>001</sub> /Å | T /°C                                           | d <sub>001</sub> /Å |
| 129.0                                           | 27.659              | 141.0                                            | 24.457              | 140.0                                            | 24.340              | 162.0                                            | 26.337              | 177.0                                           | 26.412              |
| 128.0                                           | 27.692              | 140.0                                            | 24.459              | 139.0                                            | 24.343              | 160.0                                            | 26.335              | 176.0                                           | 26.420              |
| 127.0                                           | 27.728              | 139.0                                            | 24.461              | 138.0                                            | 24.345              | 158.0                                            | 26.332              | 175.0                                           | 26.433              |
| 126.0                                           | 27.762              | 138.0                                            | 24.464              | 137.0                                            | 24.344              | 156.0                                            | 26.331              | 174.0                                           | 26.444              |
| 125.0                                           | 27.799              | 137.0                                            | 24.467              | 136.0                                            | 24.347              | 154.0                                            | 26.328              | 173.0                                           | 26.453              |
| 124.0                                           | 27.833              | 136.0                                            | 24.470              | 135.0                                            | 24.350              | 152.0                                            | 26.323              | 172.0                                           | 26.465              |
| 123.0                                           | 27.866              | 135.0                                            | 24.472              | 134.0                                            | 24.352              | 150.0                                            | 26.320              | 171.0                                           | 26.481              |
| 122.0                                           | 27.898              | 134.0                                            | 24.475              | 133.0                                            | 24.352              | 148.0                                            | 26.319              | 170.0                                           | 26.499              |
| 121.0                                           | 27.929              | 133.0                                            | 24.478              | 132.0                                            | 24.355              | 146.0                                            | 26.314              | 169.0                                           | 26.507              |
| 120.0                                           | 27.961              | 132.0                                            | 24.480              | 131.0                                            | 24.358              | 144.0                                            | 26.310              | 168.0                                           | 26.517              |
| 119.0                                           | 27.991              | 131.0                                            | 24.482              | 130.0                                            | 24.358              | 142.0                                            | 26.306              | 167.0                                           | 26.527              |
| 118.0                                           | 28.029              | 130.0                                            | 24.484              | 129.0                                            | 24.359              | 140.0                                            | 26.301              | 166.0                                           | 26.530              |
| 117.0                                           | 28.064              | 129.0                                            | 24.486              | 128.0                                            | 24.362              | 138.0                                            | 26.300              | 165.0                                           | 26.541              |
| 116.0                                           | 28.099              | 128.0                                            | 24.489              | 127.0                                            | 24.365              | 136.0                                            | 26.296              | 164.0                                           | 26.543              |
| 115.0                                           | 28.140              | 127.0                                            | 24.491              | 126.0                                            | 24.364              |                                                  |                     | 163.0                                           | 26.547              |
|                                                 |                     | 126.0                                            | 24.493              | 125.0                                            | 24.365              |                                                  |                     | 162.0                                           | 26.559              |
|                                                 |                     |                                                  |                     | 124.0                                            | 24.369              |                                                  |                     |                                                 |                     |
|                                                 |                     |                                                  |                     | 123.0                                            | 24.370              |                                                  |                     |                                                 |                     |
|                                                 |                     |                                                  |                     | 122.0                                            | 24.369              |                                                  |                     |                                                 |                     |
|                                                 |                     |                                                  |                     | 121.0                                            | 24.372              |                                                  |                     |                                                 |                     |
|                                                 |                     |                                                  |                     | 120.0                                            | 24.375              |                                                  |                     |                                                 |                     |
| $\kappa = -3.38 \pm 0.02$<br>pm K <sup>-1</sup> |                     | $\kappa = -0.25 \pm 0.004$<br>pm K <sup>-1</sup> |                     | $\kappa = -0.17 \pm 0.005$<br>pm K <sup>-1</sup> |                     | $\kappa = +0.16 \pm 0.005$<br>pm K <sup>-1</sup> |                     | $\kappa = -1.02 \pm 0.04$<br>pm K <sup>-1</sup> |                     |

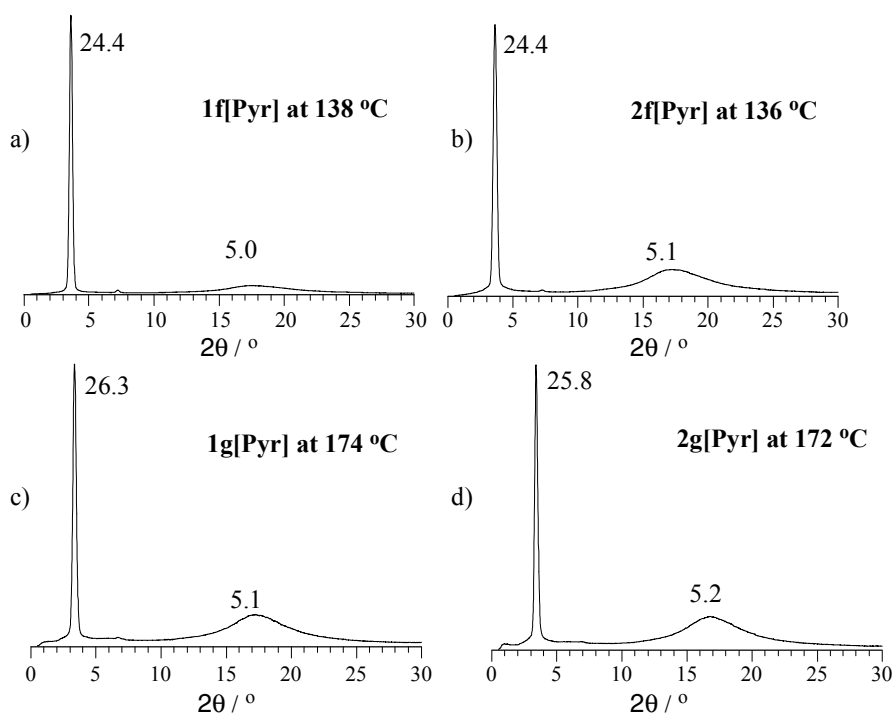

**Figure S1.** X-ray diffraction patterns for a) **1f[Pyr]** (138 °C, SmA,  $c = 24.4 \text{ \AA}$ ); b) **2f[Pyr]** (136 °C, SmA,  $c = 24.4 \text{ \AA}$ ); c) **1g[Pyr]** (174 °C, SmA,  $c = 26.3 \text{ \AA}$ ); and d) **2g[Pyr]** (172 °C, SmA,  $c = 25.8 \text{ \AA}$ ).

#### 4. Computational details and molecular modeling

Geometry optimization for **1e–1h**, and **2e–2h** was undertaken without symmetry constraints and default convergence limits with the HF/6-31G(d) method using the Gaussian 09 computational package.<sup>10</sup> The optimized geometries of the models were perturbed several times to assure conformational minimum and the fully optimized structures are shown in Figure S2.

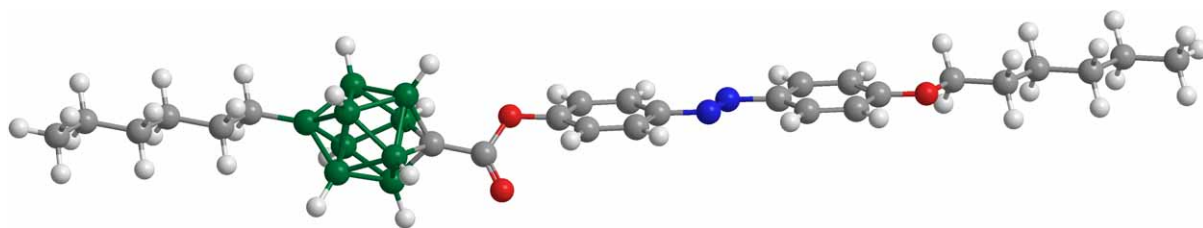

**1e**

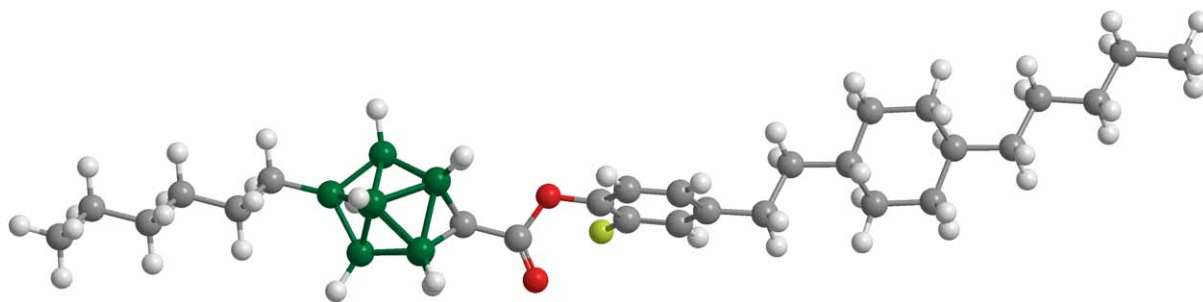

**1f**

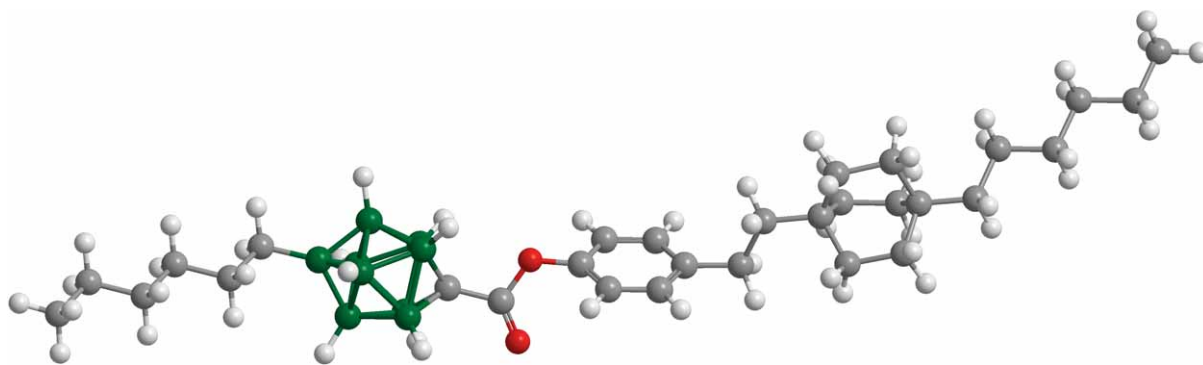

**1g**

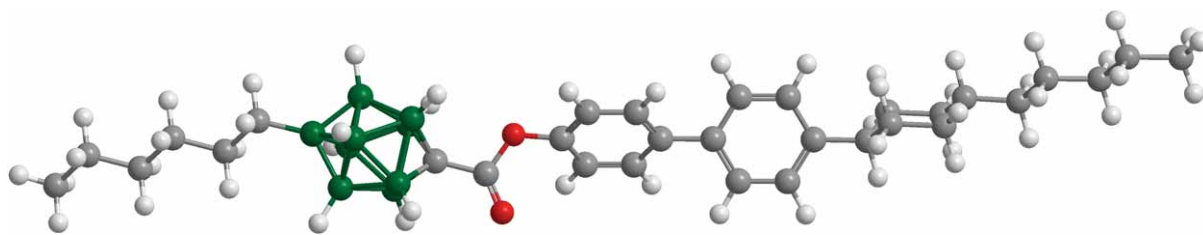

**1h**

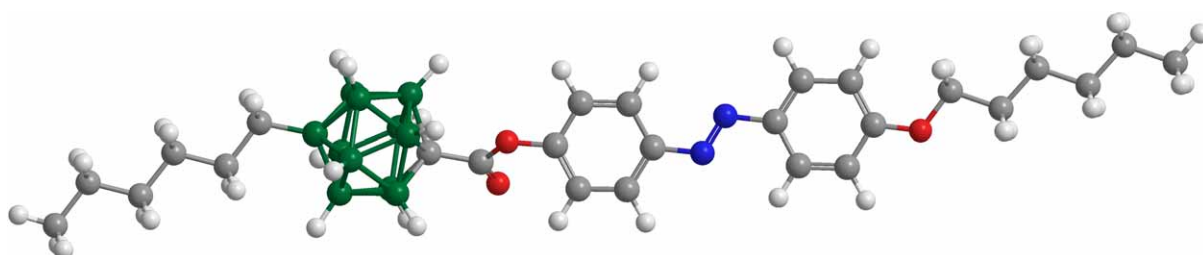

2e

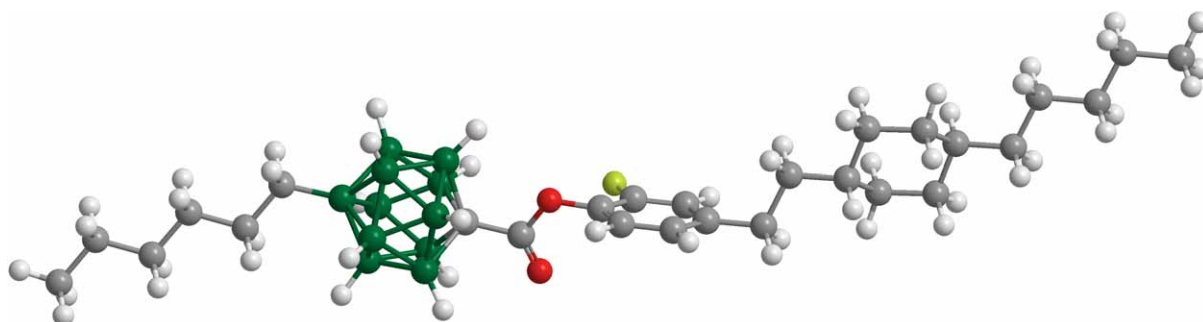

2f

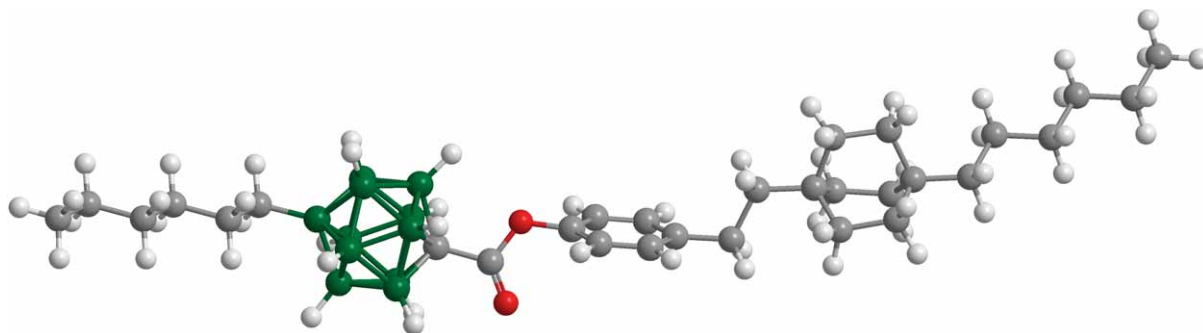

2g

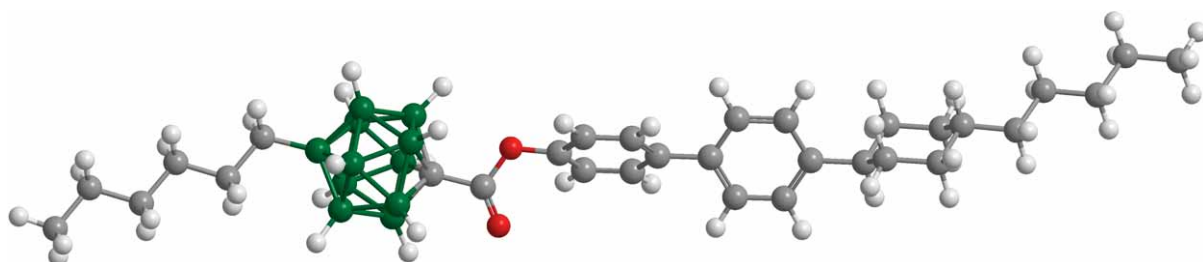

2h

**Figure S2.** Molecular structures of selected anions obtained by full geometry optimization at the HF/6-31G(d) level of theory.

**Table S3.** Molecular dimensions for selected anions.

| anion        | length $L^a$<br>/Å | Interchain<br>angle $b$<br>/° |
|--------------|--------------------|-------------------------------|
| <b>1e</b>    | 34.0               | 11                            |
| <b>1f</b>    | 31.8               | 28                            |
| <b>1g</b>    | 32.7               | 26                            |
| <b>1h</b>    | 33.8               | 25                            |
| <b>2e</b>    | 33.8               | 9                             |
| <b>2f</b>    | 31.8               | 4                             |
| <b>2g</b>    | 32.4               | 31                            |
| <b>2h</b>    | 33.8               | 24                            |
| <b>Pyr</b>   | 18.9               | 88                            |
| <b>Cetyl</b> | 23.4               | —                             |

<sup>a</sup> H...H distance measured for most extended molecular conformation optimized at the HF/6-31G(d) level of theory. <sup>b</sup> Angle between planes of terminal alkyl chains in all-trans conformation. First three carbon atoms from the core of each chain were used for the measurement.

## 5. Archive for HF/6-31G(d) computational results

### 1e

```
GINC-OCTOPUS\FOpt\RHF\6-31G(d)\C26H42B9N2O3(1-)\PIOTR\09-Mar-2011\  
0\#P HF/6-31G* FOpt geom(noangle,nodistance) fcheck\C6-CB9-COO-Ph-N=  
N-Ph-OC6\|-1,1\B,-0.0222346431,-0.0312100998,-0.1353585448\B,-0.122801  
9074,-0.0128556832,1.7268923391\B,1.7209830936,0.0240775257,1.82657269  
96\B,1.8208680992,0.0030962181,-0.0378497836\B,0.948210089,-1.53661728  
17,-0.4497376723\B,-0.4286443892,-1.5419488817,0.7918390078\B,0.808557  
3736,-1.5089442678,2.1723461034\B,2.1882350582,-1.4910732279,0.9332316  
733\B,0.9012989862,-2.6180516496,0.8736508754\C,0.832482257,0.92300043  
48,0.8354822178\C,0.8072061018,2.3984748092,0.780371584\O,0.7378272732  
,2.9369610265,2.0206684939\C,0.6824457425,4.2863217099,2.2141604999\C,  
1.6247622909,5.1553610791,1.695156144\C,1.539662965,6.5002038522,2.009  
3441267\C,0.5341287578,6.9780437703,2.8353459449\C,-0.4056638889,6.092  
8787104,3.3563169563\C,-0.3287013219,4.7525249099,3.0438805564\H,-0.74  
94901586,0.4647138564,-0.929075559\H,-0.9333638997,0.4936332657,2.4300  
311196\H,2.4317350075,0.5595739839,2.6107638364\H,2.6090234965,0.52942  
85018,-0.7501908902\H,1.0153748734,-1.947473456,-1.5678834761\H,-1.542  
2735832,-1.9671474368,0.7359332514\H,0.7571366524,-1.9076055243,3.2959  
328579\H,3.3212696709,-1.8598139443,0.9991434077\C,0.9108608205,-4.225  
2157501,0.9087136156\C,1.9673492088,-4.8936856585,0.0185434076\C,1.941  
4264546,-6.4237948941,0.0783531609\C,2.9953029931,-7.0898877329,-0.809  
0653634\C,2.969444132,-8.6186753492,-0.7496230724\C,4.0258105962,-9.27  
44971388,-1.6393546394\H,3.8860556984,-8.9983103414,-2.6811094895\H,5.
```

026990736, -8.9659180227, -1.3503913377\H, 3.9827265985, -10.3587096897, -1.5760198031\H, 3.1155687001, -8.9416642359, 0.2794396335\H, 1.9829296857, -8.9738433741, -1.0416309679\H, 2.8516450534, -6.770180529, -1.8403101133\H, 3.9844894216, -6.7379930146, -0.5191761363\H, 2.0864214817, -6.7462363476, 1.1092032118\H, 0.9529600837, -6.7786215146, -0.2125766404\H, 1.8253212276, -4.5762161549, -1.0123895923\H, 2.9567460804, -4.5440257187, 0.3060397639\H, 1.0583638075, -4.5638366499, 1.935274391\H, -0.0725221978, -4.5979806954, 0.6183026574\H, 2.3978475165, 4.7889018565, 1.0503297558\H, 2.2579155848, 7.1955546235, 1.6156175357\N, 0.5535211201, 8.3723449319, 3.086391926\N, -0.3271383652, 8.7998663805, 3.8160376777\C, -0.2967655259, 10.1956762328, 4.0589973188\C, -1.283886503, 10.691185527, 4.8851276918\C, -1.3554431227, 12.0448421007, 5.1957878292\C, -0.4171382773, 12.9121822997, 4.6647988669\O, -0.3836070202, 14.2408462293, 4.8927032027\C, -1.3480557987, 14.8402430358, 5.7180455509\C, -1.0471027299, 16.3275353019, 5.7758495941\C, -2.039987458, 17.0914288226, 6.6534866011\C, -1.7461982995, 18.5912456133, 6.7185798127\C, -2.7345365164, 19.3632089053, 7.5943439885\C, -2.4348480161, 20.8605950823, 7.65518114\H, -2.4747930978, 21.3088527209, 6.6663775894\H, -3.1519960686, 21.3805041959, 8.2830500192\H, -1.4443072182, 21.0459582911, 8.0610630461\H, -3.7438107596, 19.212560109, 7.2170459221\H, -2.7210398155, 18.9516003721, 8.6013636162\H, -0.7366204767, 18.7436124695, 7.0960860852\H, -1.760065779, 19.0041576641, 5.7114702628\H, -3.0500935959, 16.9407731196, 6.2760784741\H, -2.0261100613, 16.6800626408, 7.661478036\H, -0.0364001753, 16.4608268511, 6.1507584599\H, -1.0612331753, 16.7220736248, 4.7639400612\H, -2.3419662963, 14.6668627, 5.3144850056\H, -1.3093100686, 14.4036518634, 6.7123846088\C, 0.5857745173, 12.4166318268, 3.8265200662\C, 0.6472056107, 11.0786581859, 3.5264603976\H, 1.4172717171, 10.7011619003, 2.8827278701\H, 1.3030060028, 13.1085240696, 3.4254923707\H, -2.1369550852, 12.3941177194, 5.8416799219\H, -2.0065560443, 10.0071889783, 5.2906408659\H, -1.1841529584, 6.4581631991, 3.9968758976\H, -1.0386458103, 4.048155785, 3.4351553775\O, 0.8389264708, 3.0679153812, -0.1967129015\\Version=EM64L-G09RevA.02\State=1-A\HF=-1564.7764752\RMSD=6.386e-09\RMSF=3.780e-06\Dipole=-1.4130239, 11.5575632, 4.1206799\Quadrupole=57.0715106, -95.7462464, 38.6747358, 9.2706649, -1.7536144, -36.9931408\PG=C01 [X(C26H42B9N2O3)]\@

## 1f

1\1\GINC-OCTOPUS\FOpt\RHF\6-31G(d)\C27H49B9F1O2(1-)\PIOTR\09-Mar-2011\0\#\#P HF/6-31G\* FOpt geom(noangle,nodistance) fcheck\C6-CB9-COO-PhF-C H2CH2-Chx-C5\ -1,1\B, -0.9786801751, -0.2503752944, 0.9622713294\B, 0.2922520158, 0.0246136286, 2.3002216418\B, 1.6109551095, 0.1721996897, 1.0152969998\B, 0.3394994928, -0.1049059954, -0.3221907947\B, -0.3352702591, -1.7313948978, 0.1238592315\B, -0.3756800633, -1.6354774337, 1.9751561334\B, 1.4547840317, -1.3427687625, 2.0050998912\B, 1.4968764011, -1.4260560515, 0.1530198805\B, 0.736451982, -2.6168781672, 1.1187820675\C, 0.1682070853, 0.8746861156, 0.9421512657\C, -0.0838194643, 2.3252550457, 0.8312312802\O, 0.6663116477, 3.0305679981, 1.7144929829\C, 0.5815328596, 4.3912059302, 1.7057935952\C, 1.6169138836, 5.147474296, 1.2000325796\C, 1.5649407558, 6.5326167329, 1.2492068072\C, 0.4735581021, 7.1860032551, 1.8029862175\C, -0.5683024164, 6.4162580096, 2.3108195363\C, -0.5035229851, 5.0434637816, 2.2597534217\H, -2.113858281, 0.0883824059, 0.9258247505\H, 0.1792733251, 0.5791724865, 3.341977266\H, 2.5843768709, 0.8509366963, 0.9963974175\C, 0.5484432971, 13.3737159944, 4.729151185\H, 0.289254383, 0.3573392524, -1.412573004\H, 2.5198032233, 13.1168623488, 3.9064562654\H, 2.467885124, 12.9364903679, 5.640134663\H, 1.3489394026, 10.7634144583, 5.4472101648\H, 2.8373624818, 10.7599172885, 4.5411240196\C, -0.3218640842, 11.4312988851, 3.3188686885\H, 1.6070467734, 11.1335883522, 2.4466114512\C, -0.2288888221, 12.9516935927, 3.4752241826\H, -1.2294316359, 13.3769376471, 3.5027586841\H, 0.2601230417, 13.3726419483, 2.5968444066\H, -0.8603584554, 11.2006115737, 2.4050876084\H, -0.9114710875, 11.0200992568, 4.138054339\C, 1.0597151674, 10.7625015997, 3.3150639825\H, -1.0379680841, -2.2914810143, -0.6613039656\H, 1.9921507246, 8.8286597814, 3.3388675076\H, 0.4009539007, 8.8401358826, 4.0380856224\H, 0.987906755, 9.1212973219, 1.0613268089\H, -0.6031472006, 9.0245010508, 1.7611440096\C, 1.8371249787, 11.1847555633, 4.5689475398\C, 1.9300761715, 12.7051746403, 4.7257344384\C, 0.617808169, 14.9038599696, 4.8355650489\H, -1.1128585804, -2.124417727, 2.7761799368\C, 1.1934698108, 15.444030131, 6.1478342

714\H,2.2850866281,-1.5818684036,2.8284209424\C,1.1235263563,16.969844  
065,6.2426655784\H,2.3656851789,-1.7203915802,-0.6106764543\C,1.703410  
2682,17.5238139212,7.5454066907\C,0.9909175084,-4.2006753361,1.2276917  
78\C,1.1697542267,-4.9290671435,-0.1112806602\C,1.4059618501,-6.435127  
9079,0.0356147447\C,1.5847832446,-7.1608166761,-1.2997849482\C,1.82049  
93864,-8.6656052596,-1.153261073\C,1.997975837,-9.3812887141,-2.492653  
1354\H,1.1188606344,-9.2607303959,-3.120102393\H,2.8478839879,-8.98215  
69431,-3.0398801087\H,2.1633325184,-10.4468801664,-2.3562687403\H,2.70  
13583595,-8.8338636186,-0.5364602505\H,0.9848905799,-9.110444637,-0.61  
61399003\H,0.7044968057,-6.9960070357,-1.9196628629\H,2.4211494491,-6.  
71938665,-1.8401713084\H,2.2872970147,-6.6026272632,0.6543917926\H,0.5  
697901211,-6.879629167,0.5749200357\H,0.2910139268,-4.7663898392,-0.73  
18795349\H,2.0047511146,-4.4901743893,-0.6534970224\H,1.8734580996,-4.  
3841596094,1.8423493867\H,0.1614658999,-4.662907352,1.7650103023\C,1.6  
273006813,19.0477647982,7.6341081324\H,2.4591936308,4.6376222134,0.770  
3171681\H,2.3822758287,7.1038547357,0.8447201701\C,0.4233349013,8.6970  
463339,1.8875974009\C,0.990649885,9.2323469442,3.2118289728\H,-1.44009  
9501,6.8706281535,2.7461151551\F,-1.5011009892,4.3293380421,2.75834260  
35\H,2.176792516,19.5155792821,6.8218636385\H,0.5986234743,19.39284906  
67,7.5770331193\H,2.0460679041,19.4101491689,8.5681861617\H,1.17397991  
67,17.0868471419,8.3895293466\H,2.7404360262,17.2087994205,7.640662797  
8\H,1.6553816763,17.4079740632,5.3993598761\H,0.0872588401,17.29037665  
03,6.1472697678\H,0.6505203745,15.008031318,6.9851227503\H,2.228494605  
7,15.1324069808,6.2595233689\H,1.1994518138,15.2931499919,4.0006064051  
\H,-0.388316164,15.3014311432,4.7125838025\O,-0.8215712225,2.862060665  
3,0.0767066598\H,0.0011214322,13.0026593527,5.5972644882\Version=EM64  
L-G09RevA.02\State=1-A\HF=-1522.4564695\RMSD=5.915e-09\RMSF=4.498e-07\  
Dipole=1.1792719,11.1543166,2.5985407\Quadrupole=50.3882972,-90.213533  
3,39.8252361,-3.4161567,-5.5887667,-32.3209579\PG=C01 [X(C27H49B9F1O2)  
J]\@

### 1g

1\1\GINC-OCTOPUS\FOpt\RHF\6-31G(d)\C30H54B9O2(1-)\PIOTR\09-Mar-2011\0\  
\#P HF/6-31G\* FOpt geom(noangle,nodistance) fcheck\C6-CB9-COO-Ph-CH2C  
H2-BCO-C6\|-1,1\B,0.1913443289,-0.0621164147,-0.2233971457\B,-0.089122  
523,-0.2632829502,1.6087980725\B,1.7358083762,-0.250373444,1.889969197  
8\B,2.0157679086,-0.051479046,0.0552669084\B,1.1950915433,-1.526393773  
9,-0.6186669676\B,-0.2953054055,-1.6695644084,0.4744196468\B,0.8021026  
179,-1.8079612421,1.9621928572\B,2.2950437349,-1.6527449827,0.87329664  
63\B,1.0257674978,-2.7562758753,0.556595787\C,0.9430566219,0.765312866  
4,0.9312352801\C,0.9152237544,2.2385376283,1.0494234496\O,0.7260772343  
,2.6291389267,2.3283247785\C,0.6401396321,3.9593257894,2.6454750801\C,  
1.7026342028,4.8250632818,2.4574236488\C,1.5857605931,6.1406650922,2.8  
677113537\C,0.4260783305,6.6146283108,3.4726488436\C,-0.6233839104,5.7  
235752704,3.6515640896\C,-0.5228334362,4.4037242965,3.2419657992\H,-0.  
458394332,0.528155101,-1.0199381507\H,-0.9668524769,0.1610904545,2.285  
1583685\H,2.3649998879,0.1832789332,2.7971770563\C,0.6421980338,12.012  
1913792,7.1707025739\H,2.8668868687,0.5495599591,-0.5105381911\H,2.099  
6959671,11.2927621041,8.6060125707\H,0.4688168805,10.7841182428,8.9415  
649836\H,1.0778574762,8.775649609,7.9692804707\H,2.4983937547,9.459748  
9446,7.234769669\C,1.4350853555,10.693044279,5.1439867334\C,-0.7183728  
944,10.0856580511,6.232485203\C,-0.7547746017,11.5606624736,6.70334473  
45\H,-1.4823815522,11.6754685822,7.4998175152\H,-1.0816949445,12.20871  
62764,5.8931927977\H,-1.3020407029,9.9746789511,5.3252634376\H,-1.1803  
292617,9.4398989996,6.9755066715\C,1.561557857,12.0177204869,5.9325067  
153\H,1.3144310437,12.8616160045,5.2937901169\H,2.5881617901,12.170261  
8611,6.2572190132\H,2.4159063328,10.3393867943,4.8372457443\H,0.867856  
5131,10.8561305842,4.2327869398\C,0.7349232125,9.62661697,6.0065304852  
\H,1.3722945479,-1.8026010456,-1.7659769642\H,1.8552023565,7.886128191  
5,5.4357809034\H,0.2629685526,7.5313141745,6.0294064959\H,0.9040531953  
,8.6838827835,3.2843675994\H,-0.706845248,8.3777534048,3.8647084351\C,  
1.4329210935,9.6175486817,7.3818567947\C,1.1823321037,10.9432519006,8.  
1385176152\C,0.6282716042,13.4208679259,7.7906405875\H,-1.3961872077,-  
2.0783427417,0.2610581616\C,-0.0948584386,13.5940931383,9.1308334584\H

```
,0.644131059,-2.3366340653,3.020484755\C,-0.0798993598,15.0467132818,9
.6146048847\H,3.4183971587,-2.0341206705,1.0044360516\C,-0.7828340717,
15.2439533051,10.9588819697\C,1.039774415,-4.3565882848,0.4019352113\C
,2.1820328384,-4.9221523879,-0.4529070462\C,2.1580479751,-6.4483922726
,-0.5778189003\C,3.297515683,-7.0117939449,-1.4299219624\C,3.273612784
1,-8.5366519239,-1.555040457\C,4.4157508158,-9.0895595498,-2.407965241
5\H,4.3779227114,-8.6909204317,-3.4182772077\H,5.3820445553,-8.8241276
718,-1.9873483882\H,4.3720949986,-10.1733410204,-2.4782184954\H,3.3192
699681,-8.9803013646,-0.5621912802\H,2.3224513885,-8.8480832596,-1.982
7528477\H,3.2545521201,-6.5711831289,-2.4250803742\H,4.2515765519,-6.7
033987039,-1.0044478291\H,2.2024171668,-6.8917135319,0.4167549219\H,1.
204832419,-6.7596274219,-1.0046112705\H,2.140643736,-4.4838209359,-1.4
47866434\H,3.136564757,-4.6156860867,-0.0300899001\H,1.0872624866,-4.8
154042202,1.3906550945\H,0.0916393538,-4.6858555321,-0.0258919172\C,-0
.7703785551,16.6951017047,11.4430724469\H,2.5990247274,4.4735052021,1.
9841530567\H,2.4137871153,6.810823615,2.7093264025\C,0.3244665062,8.04
99125136,3.9476453416\C,0.8195197635,8.2172284911,5.3944282551\H,-1.53
64940455,6.0604144318,4.1127817145\H,-1.3343379381,3.7134433849,3.3801
905201\H,0.2588355113,17.0387365641,11.5239275163\H,-1.2446167262,17.3
279664074,10.6957714009\C,-1.4741256171,16.8840043675,12.78661791\H,-1
.8135716808,14.9017030495,10.8803141008\H,-0.3098363224,14.6122012272,
11.7091153153\H,0.9506423066,15.3890920523,9.6951372453\H,-0.552595236
6,15.6806439583,8.8661288259\H,-1.1265537356,13.2621140609,9.049748023
4\H,0.37030633,12.9674569064,9.8871969567\H,1.6606067943,13.7448007289
,7.9177952488\H,0.1879374907,14.1055625945,7.0668849346\O,1.0392804141
,3.0159465078,0.1630075481\H,-1.448680328,17.9225163931,13.1030156316\
H,-2.5159792668,16.5812288164,12.7292991173\H,-1.0012488861,16.2898890
643,13.5636902795\\Version=EM64L-G09RevA.02\State=1-A\HF=-1539.5361441
\RMSD=9.353e-09\RMSF=3.165e-06\Dipole=-0.3810943,10.9695481,6.2600395\
Quadrupole=66.4798512,-83.9201414,17.4402902,8.6826448,3.4949981,-73.2
367522\PG=C01 [X(C30H54B9O2)]\@
```

## 1h

```
1\1\GINC-OCTOPUS\FOpt\RHF\6-31G(d)\C31H50B9O2(1-)\PIOTR\07-Apr-2011\0\
\#P HF/6-31G* FOpt geom(noangle,nodistance) fcheck\C6-CB9-COO-PhPhChx
-C5, restart\ -1,1\B,-6.311957769,-1.7696262197,0.3567984607\B,-5.7819
960718,-1.0477557654,-1.2811769791\B,-5.7664476889,0.6396458264,-0.531
0667611\B,-6.2933548088,-0.0825620529,1.1054395482\B,-7.8675622559,-0.
8868278193,0.6780474585\B,-7.50119878,-1.578513029,-1.0070132117\B,-7.
1238897434,0.1280781463,-1.6267153849\B,-7.4776564171,0.8162708415,0.0
580611455\B,-8.5465102252,-0.2469497877,-0.7545482381\C,-5.148648132,-
0.67935577,0.1480526261\C,-3.7428486958,-0.8759467834,0.5580953246\O,-
2.8853385598,-0.4654538199,-0.4030345711\C,-1.5323484644,-0.5343315036
,-0.2144072814\C,-0.8097021445,0.6334899908,-0.3628174841\C,0.57073440
92,0.6063295458,-0.2636716557\C,1.2494314244,-0.581669677,-0.013626646
9\C,2.7347721017,-0.6102117827,0.0973027893\C,3.3697753812,-1.32080843
23,1.1096290823\C,4.751715942,-1.345380684,1.208228466\C,5.5561626243,
-0.661663464,0.3063733033\C,0.4968667588,-1.7457513497,0.1298514532\C,
-0.8814285984,-1.7313435279,0.0289312386\H,-6.0327660124,-2.8167386648
,0.8377733811\H,-5.0847651181,-1.5167988989,-2.118318968\H,-5.05478334
39,1.5635755533,-0.7497946935\C,9.8898386433,-0.0302127128,-0.34983289
51\H,-6.0014641173,0.2577660855,2.202684322\H,9.4445738051,0.058221055
,1.754007132\H,9.5813288412,1.6298556591,1.0119670949\H,7.4334521249,1
.3516221662,-0.1326367998\H,7.2285164044,1.1221185511,1.5812697199\C,7
.7508594838,-1.3525432201,-0.7805611921\H,7.3013648382,-1.3180650768,1
.2998456365\C,9.2713200682,-1.4105563291,-0.6132463561\H,9.7196514964,
-1.8505426154,-1.5009189212\H,9.5167374748,-2.0735458883,0.2162764384\
H,7.3536504834,-2.3526528827,-0.9283121291\H,7.5096598863,-0.788923944
9,-1.6792219763\C,7.0698127119,-0.7003012481,0.4337255966\H,-8.5687452
559,-1.272119351,1.5633123744\C,7.678365387,0.687335,0.6933559895\C,9.
2003797549,0.6253510025,0.8555650192\C,11.4125435371,-0.1411407766,-0.
1862317115\H,-7.8858801824,-2.5605719654,-1.5655135984\C,12.1640666572
,1.1916868134,-0.1228831374\H,-7.2005037039,0.6114037192,-2.7151895113
\C,13.683612339,1.0142753836,-0.0839638292\H,-7.8548596728,1.892044324
```



4, 0.4112903456\C, 14.4470590128, 2.3379782748, -0.0116482259\C, -10.082938  
1897, -0.0242463, -1.1723081183\C, -11.0120523786, -1.21789885, -0.91283332  
02\C, -12.4660932854, -0.9644650802, -1.3215729083\C, -13.3920181544, -2.15  
51316749, -1.0630318267\C, -14.844881783, -1.902055483, -1.4711321417\C, -1  
5.7616407609, -3.0972465446, -1.2089833638\H, -15.4290391109, -3.973485691  
1, -1.7591386682\H, -15.7726190212, -3.3578565526, -0.1539803411\H, -16.785  
2230667, -2.8875564401, -1.5085037592\H, -15.223735512, -1.0341360727, -0.9  
346485533\H, -14.8826181114, -1.6452861278, -2.5281545643\H, -13.017016842  
9, -3.0258245855, -1.5993434765\H, -13.3581449188, -2.414479982, -0.0057181  
142\H, -12.8442554225, -0.0943919599, -0.7852982703\H, -12.5027706703, -0.7  
061399389, -2.3796767469\H, -10.6398476611, -2.0893042608, -1.4475751424\H  
, -10.9803322994, -1.4783454969, 0.1430773899\H, -10.4784200784, 0.84372977  
86, -0.6426064713\H, -10.1364515254, 0.2324932728, -2.2313231823\C, 15.9638  
041745, 2.1528577619, 0.0238633343\H, -1.3360100445, 1.5506769355, -0.55126  
51001\H, 1.1209152063, 1.5251632704, -0.3611705085\H, 0.9960218911, -2.6824  
384368, 0.3024900897\H, -1.4484379991, -2.6346877109, 0.140328914\H, 16.267  
1388224, 1.5678519437, 0.8877248377\H, 16.3164902966, 1.6355689933, -0.8641  
307737\H, 16.476853267, 3.1085062182, 0.0752554299\H, 14.1792736068, 2.9551  
0175, -0.8667723912\H, 14.1305701268, 2.8884540957, 0.8718154904\H, 13.9525  
762157, 0.3987023376, 0.7731721342\H, 14.0054645692, 0.4630834482, -0.96616  
65469\H, 11.8963377274, 1.7969566414, -0.9877183477\H, 11.8540103, 1.755816  
4214, 0.7525744574\H, 11.6333388479, -0.7213358423, 0.7090747851\H, 11.8052  
402751, -0.7172494183, -1.022458139\O, -3.3674151564, -1.3304471015, 1.5864  
39268\H, 9.6923531358, 0.5916379955, -1.2246325782\C, 4.9190406068, 0.05097  
38104, -0.7062742132\C, 3.5406263231, 0.0752051801, -0.8100319205\H, 3.0829  
328184, 0.6180197657, -1.6176527723\H, 5.5007693117, 0.5903236155, -1.43328  
66232\H, 5.2073469846, -1.9017990332, 2.0095720487\H, 2.7796226559, -1.8441  
95547, 1.840369917\Version=EM64L-G09RevA.02\State=1-A\HF=-1575.0913064  
\RMSD=7.630e-09\RMSF=2.705e-06\Dipole=13.0148889, 0.3289149, -0.2138175\  
Quadrupole=-131.8233326, 68.9327072, 62.8906253, -4.6643974, -3.9226713, -1  
.293645\PG=C01 [X(C31H50B9O2)]\@

## 2e

1\1\GINC-OCTOPUS\FOpt\RHF\6-31G(d)\C26H44B11N2O3(1-)\PIOTR\10-Mar-2011  
\0\#P HF/6-31G\* FOpt geom(noangle,nodistance) fcheck\C6-CB11-COO-Ph-  
N=N-Ph-OC6\ -1, 1\B, -6.9875272496, 0.510851906, -0.8115470984\B, -6.652185  
586, -1.1750326569, -0.2977420897\B, -7.379973214, 1.4701243986, 0.65484714  
16\B, -6.8338472501, -1.2589266859, 1.4847663259\B, -7.9607570654, -0.23521  
65259, 0.5121949561\B, -7.2942235846, 0.3737406782, 2.0724455694\C, -4.7962  
893165, 0.5074821645, 0.8810789962\C, -3.3551046052, 0.8690954691, 1.100514  
0388\B, -5.615559751, -0.1970161, 2.221151706\O, -2.5536009601, 0.331763056  
8, 0.1608686126\C, -1.2000127433, 0.5207373255, 0.1955429198\C, -0.63137582  
39, 1.7792554029, 0.1460391949\B, -5.2171955187, -1.1541826739, 0.752629919  
6\C, 0.747081936, 1.8886550374, 0.1016460349\B, -5.9537526184, 1.4812125531  
, 1.7099444656\C, 1.5509293414, 0.7590592611, 0.0997253375\C, 0.9653207252,  
-0.502899092, 0.144639711\B, -5.3158049537, -0.0677022652, -0.6635836024\C  
, -0.4079672363, -0.6181495731, 0.1929989091\B, -5.758655213, 1.5652125611,  
-0.0715382571\H, -5.2380234501, 2.5166138782, -0.5522107114\H, -4.52690751  
05, -0.1703037669, -1.5365616718\H, -5.5668324163, 2.3793008866, 2.37172525  
58\C, -9.5133336079, -0.6566987082, 0.3282367239\C, -10.5296320301, 0.49154  
31863, 0.2935014792\H, -4.3517035243, -1.9618742861, 0.8098131507\C, -11.97  
59080809, 0.0184346462, 0.1205913743\C, -12.9934299263, 1.1608533189, 0.084  
7792037\H, -5.0007817916, -0.389008427, 3.2142314932\C, -14.4386755248, 0.6  
887757556, -0.0877227275\H, -7.970034797, 0.5316273729, 3.0399585468\C, -15  
.4476067044, 1.8370140138, -0.1223941098\H, -15.4137295935, 2.4154426615, 0  
.7970195923\H, -7.189429936, -2.251984705, 2.0369272443\H, -15.2389253583,  
2.5164737742, -0.9444989004\H, -16.4635812655, 1.4709928072, -0.2456087004  
\H, -8.1071798894, 2.4103819193, 0.6222951276\H, -14.5214061902, 0.10986202  
29, -1.0056728346\H, -14.694971004, 0.0095775904, 0.7232007701\H, -12.91467  
32133, 1.7419634899, 1.0025693017\H, -6.8802567104, -2.1069651314, -1.00257  
82218\H, -12.7411198782, 1.8423790031, -0.7264772786\H, -12.0573991403, -0.  
5620925997, -0.7979779932\H, -7.4450925086, 0.7670429048, -1.8807822798\H,  
-12.2312213198, -0.6626646268, 0.931949209\H, -10.4543055303, 1.0737531723  
, 1.2095021937\H, -10.281239032, 1.1746542498, -0.5160946221\H, -9.61717055

21, -1.2355700364, -0.5901145996\H, -9.7916686024, -1.3378537542, 1.1331605  
433\H, -1.2543570037, 2.6515506375, 0.1534962218\H, 1.2146369253, 2.8552719  
848, 0.0661914959\N, 2.9471590759, 0.9975679011, 0.0484477853\N, 3.66121395  
06, 0.0073810924, 0.0426054484\C, 5.0550202728, 0.2575504733, -0.0084608208  
\C, 5.8724691712, -0.8533390472, -0.0191851937\C, 7.2569580474, -0.73222979  
41, -0.0680521471\C, 7.8256122556, 0.5287073594, -0.1064031943\O, 9.1507455  
301, 0.7723700257, -0.1550841834\C, 10.0649370704, -0.2930666104, -0.166849  
3006\C, 11.4627103954, 0.2977967524, -0.2217585864\C, 12.5513768408, -0.776  
5187373, -0.2390653608\C, 13.9640050685, -0.1921621507, -0.2943019771\C, 15  
.0593175035, -1.2597361616, -0.3119062672\C, 16.4677511308, -0.668975006, -  
0.3671105999\H, 16.6609026359, -0.0349443476, 0.4936759458\H, 17.222066012  
6, -1.4498050459, -0.3784698938\H, 16.6044064526, -0.064012614, -1.25908288  
09\H, 14.9656042814, -1.8863942544, 0.5725083687\H, 14.9095178645, -1.91526  
81247, -1.1671997272\H, 14.059162382, 0.4348370255, -1.179052483\H, 14.1152  
575117, 0.4636835975, 0.5612300539\H, 12.4579530171, -1.4035534951, 0.64610  
7316\H, 12.4018073531, -1.4324366271, -1.0951360365\H, 11.5388982195, 0.922  
3242414, -1.1071927142\H, 11.5951091085, 0.9512078618, 0.6357550608\H, 9.94  
08701115, -0.8987915984, 0.7266987659\H, 9.8842755688, -0.9280226742, -1.02  
99619341\C, 7.0027370532, 1.6588154695, -0.0954828298\C, 5.6373470451, 1.52  
78897616, -0.0471661524\H, 5.0083785269, 2.396350146, -0.0383150617\H, 7.46  
64385728, 2.6273265252, -0.1253282777\H, 7.8610522341, -1.6181846738, -0.07  
49394777\H, 5.4182632774, -1.8266328804, 0.0112979525\H, 1.5846672173, -1.3  
781385118, 0.1418008342\H, -0.8856704348, -1.5793771109, 0.2245483887\O, -2  
.9358614702, 1.5354987564, 1.9831551126\\Version=EM64L-G09RevA.02\State=  
1-A\HF=-1615.3671043\RMSD=4.272e-09\RMSF=2.421e-06\Dipole=11.9197861, -  
0.4041832, -1.197548\Quadrupole=-93.1829637, 52.0760752, 41.1068884, -10.9  
883931, 9.4803702, -2.1908419\PG=C01 [X(C26H44B11N2O3)]\@

## 2f

1\1\GINC-OCTOPUS\FOpt\RHF\6-31G(d)\C27H51B11F1O2(1-)\PIOTR\09-Mar-2011  
\0\#\# HF/6-31G\* FOpt geom(noangle,nodistance) fcheck\C6-CB11-COO-PhF  
-CH2CH2-Chx-C5\\-1,1\B, -0.0460524813, -0.8049833311, -6.2795464667\B, -1.  
3625460988, 0.2803026564, -5.7227107623\B, 1.4068026632, 0.2027129274, -6.5  
939713498\B, -0.7230940496, 1.9546651664, -5.6856169546\B, -0.2309518361, 0  
.8348469656, -7.0126724091\B, 0.9881924494, 1.9077463109, -6.2248365566\C,  
0.731448816, 0.4048572463, -3.9156432083\C, 1.2235548765, 0.1802418386, -2.  
5149767098\B, 0.5935745954, 2.0186721801, -4.4903443593\O, 0.2154257329, 0.  
1751064695, -1.6178613961\C, 0.5051121513, -0.0819645797, -0.308631906\C, 0  
.1693793564, -1.2967219831, 0.2485573017\B, -0.8612838266, 1.016428574, -4.  
1873426105\C, 0.4008917227, -1.5380362153, 1.5944484908\B, 1.9084330651, 0.  
9374475083, -5.0570677705\C, 0.9745886015, -0.5685024727, 2.4045224758\C, 1  
.3111251772, 0.6548140789, 1.8336957429\C, 1.073681772, 0.8841235083, 0.498  
5170583\B, -0.4401849652, -0.6832152016, -4.5481795617\B, 1.2722972926, -0.  
7324781459, -5.0904390782\H, 1.9615491712, -1.6240672631, -4.7287177913\C,  
0.0444964973, 0.0920540235, 9.1535346748\H, -0.8452434759, -1.5474136872, -  
3.8446699864\H, -0.9537103758, -1.7391370671, 8.6248968835\H, -2.051673923  
8, -0.4192070627, 8.929997955\H, -1.4366504544, 0.6677558127, 6.8201351265\  
H, 3.0116928009, 1.1302554971, -4.682818367\H, -1.9775687643, -0.9623048396  
, 6.5256039279\C, 1.2877193233, 0.0890650842, 6.9233558312\H, -1.5513836619  
, 1.2639016934, -3.2615929194\H, 0.3464802306, -1.7405705538, 6.3429830888\  
C, 1.3625795761, -0.2017967565, 8.4248484569\H, 0.8528737751, 2.904562547, -  
3.7469748321\H, 2.165930123, 0.3811699045, 8.8691725818\H, 1.4984515949, 2.  
8231748644, -6.7904292853\H, 1.6239511682, -1.2493294298, 8.5739378679\H, 2  
.2396179254, -0.1608155333, 6.4654607832\H, -1.4196277816, 2.9013670906, -5  
.875911533\H, 1.1414372967, 1.1581382121, 6.770155837\C, 0.1433902015, -0.6  
729696843, 6.2407979535\H, 2.2183130411, -0.0901044939, -7.4122992732\H, -0  
.8844443306, -0.8349858404, 4.3627553676\H, -0.1329596214, 0.7124934989, 4.  
6109443154\H, -2.5093000358, 0.0443892864, -5.9396142696\H, 1.3739934511, -  
1.8749169732, 4.045623073\H, 2.1072757333, -0.3026006372, 4.1897100787\H, -  
0.266672884, -1.8085356153, -6.8821021747\C, -1.1747055741, -0.3792478057,  
6.9696587984\C, -1.1000341097, -0.6698113395, 8.471282901\C, 0.170629058, -  
0.2213468534, 10.6513115414\C, -1.0140702246, 0.2205799749, 11.5152596\C, -  
0.7764469263, -0.008400749, 13.0096137112\C, -1.9560093079, 0.4207919363, 1  
3.8840885288\C, -0.7570038188, 1.0669621253, -8.5266266445\C, 0.2264536363

,0.7167630275,-9.6502711492\C,-0.3393292938,0.9622704559,-11.052112596  
9\C,0.6385339588,0.6140617632,-12.1765361527\C,0.0738649356,0.85926241  
75,-13.5773941499\C,1.0579064073,0.508491438,-14.693751667\H,1.9668851  
236,1.098752084,-14.6137290387\H,1.3430059232,-0.5392661818,-14.649009  
1559\H,0.6291167028,0.6929494522,-15.6753432919\H,-0.8371210883,0.2775  
939475,-13.7054949149\H,-0.2177388756,1.9037295235,-13.6704914593\H,1.  
5512772748,1.1952443745,-12.0526346919\H,0.9319395688,-0.4310648955,-1  
2.0876636537\H,-1.2520416856,0.3805964772,-11.1789641638\H,-0.63238210  
74,2.0077877649,-11.1439888957\H,1.1394533843,1.2961162256,-9.53012353  
78\H,0.521633683,-0.3269798442,-9.5651179328\H,-1.6699189318,0.4894075  
609,-8.6763752633\H,-1.0526242565,2.110437607,-8.6413514651\C,-1.71013  
38436,0.1918897687,15.3751386636\H,-0.2729298868,-2.0445429879,-0.3831  
630121\H,0.1358157671,-2.4945454895,2.0098757564\C,1.2018999346,-0.814  
3907522,3.8812565773\C,0.014861469,-0.3574243891,4.7439027625\H,1.7631  
378592,1.438769986,2.4141528678\F,1.3922477462,2.057618398,-0.02486856  
72\H,-1.5289479044,-0.8585065775,15.5857770815\H,-0.8444811635,0.75067  
32972,15.7199880537\H,-2.5637385532,0.505491066,15.9685995016\H,-2.167  
69423,1.4739357719,13.7113003606\H,-2.8475026375,-0.12283134,13.578405  
6892\H,-0.5669180503,-1.0628152989,13.1836700094\H,0.1154548806,0.5333  
823931,13.3205321846\H,-1.2110605546,1.2775000277,11.3419008183\H,-1.9  
140197006,-0.310685991,11.2174197348\H,0.3295060924,-1.2915708938,10.7  
79310423\H,1.069897519,0.2634323596,11.0278333202\O,2.34667181,0.00253  
01176,-2.1923694398\H,-0.158416624,1.1593934684,9.0512006183\Version=  
EM64L-G09RevA.02\State=1-A\HF=-1573.047108\RMSD=6.264e-09\RMSF=1.621e-  
06\Dipole=-0.6418843,-1.1540866,11.0485861\Quadrupole=39.6489264,48.60  
71458,-88.2560722,2.0686832,3.0913731,8.6210044\PG=C01 [X(C27H51B11F10  
2)]\@

## 2g

1\1\GINC-OCTOPUS\FOpt\RHF\6-31G(d)\C30H56B11O2(1-)\PIOTR\09-Mar-2011\0  
\#P HF/6-31G\* FOpt geom(noangle,nodistance) fcheck\C6-CB11-COO-Ph-CH  
2CH2-BCO-C6\ -1,1\B,5.6992790125,-0.701314944,-1.3162084486\B,6.155063  
9671,-2.1816317596,-0.4088793472\B,5.2780209803,0.5738936178,-0.131696  
1966\B,5.9991837787,-1.8266759433,1.3340990583\B,5.4503827149,-0.12402  
40791,1.5052578845\B,8.0699547966,-0.1065588174,0.2516590588\C,4.95196  
10172,-1.0958933032,0.179135484\C,3.5380939906,-1.6056634652,0.1558429  
468\B,7.1604907956,-0.5492280856,1.7484041389\O,2.6409675509,-0.606081  
1524,0.111911898\C,1.2982279344,-0.8920388648,0.1116898423\B,7.6002164  
441,-1.8192316539,0.5587001878\C,0.6880588676,-1.4562401843,-0.9927262  
815\C,-0.6799007307,-1.6596300125,-0.9804620247\B,6.7179144415,0.93209  
2569,0.8391496337\C,-1.4570933132,-1.3028794242,0.1168828453\C,-0.8171  
219533,-0.735920765,1.2109473591\B,7.4114689883,-1.1278513955,-1.08641  
40506\C,0.5530471584,-0.5293198805,1.2145940655\B,6.8723361215,0.57581  
50952,-0.9120800225\H,7.1548708146,1.4170299734,-1.7065561982\C,-7.889  
3349708,-0.3314092093,-0.6130410353\H,8.066937781,-1.4947107047,-2.008  
4959546\H,-7.7533043159,1.2524224457,-2.087877245\H,-7.5679853228,1.80  
00434253,-0.4456906175\H,-5.2962803409,1.791732668,-0.8807394484\H,6.8  
981109415,2.0236305917,1.2793862582\H,-5.4822811548,0.8114254486,-2.30  
54752111\H,8.3985024432,-2.6682148003,0.8038061229\C,-5.7648945607,-1.  
5917865985,-1.2252068478\C,-5.8580596983,-0.3157455447,0.9089391938\C,  
-7.3892666556,-0.5345030297,0.8300300995\H,7.6528885711,-0.5018268457,  
2.8315268968\H,-7.8938612745,0.1429301091,1.5107556176\H,4.6519186418,  
0.1428264138,2.340329192\H,-7.6449923502,-1.54117895,1.1531051157\H,-5  
.4101629173,-1.0751574443,1.5403960766\H,5.5498633237,-2.6484280942,2.  
0568999368\H,-5.6361996187,0.6411787538,1.3753679957\C,-7.2863560399,-  
1.4615865037,-1.4718149006\H,4.3817070101,1.3063834409,-0.3639224125\H  
, -7.786009979,-2.4005837592,-1.2486786265\H,-7.4848459014,-1.251085515  
2,-2.5200916573\H,-5.2386607441,-1.727922215,-2.1663467427\H,5.8121147  
062,-3.2340490487,-0.8213990826\H,-5.5599442424,-2.4745555526,-0.62740  
91581\C,-5.2357420272,-0.3404079533,-0.5002908344\H,5.0584893817,-0.80  
62808847,-2.3092031014\H,-3.339090446,-0.1116671697,-1.4804095964\H,-3  
.401114352,0.6006272407,0.1014900501\H,-3.1958351661,-2.3815113707,-0.  
4817315734\H,-3.2973792005,-1.7022758952,1.1163304247\C,-5.7699836922,  
0.8908548591,-1.2601619588\C,-7.3076089963,0.9975476584,-1.1294322803\

C, -9.4238962595, -0.3873746843, -0.7172982569\C, -10.216484993, 0.75356222  
35, -0.0698849443\C, -11.7292050323, 0.5556063042, -0.1996075422\C, -12.543  
5549535, 1.6893781271, 0.4260879613\C, 9.6027467443, 0.4094075559, 0.335055  
8281\C, 10.5303251312, -0.0299282994, -0.8047152493\C, 11.9628607212, 0.491  
5729351, -0.6583913072\C, 12.8917963994, 0.0560904623, -1.793833063\C, 14.3  
232823864, 0.5766504988, -1.6481063834\C, 15.2435142478, 0.136457586, -2.78  
69788431\H, 15.3073557206, -0.9470472113, -2.841771941\H, 14.8762941398, 0.  
4916531903, -3.7461817133\H, 16.2516634794, 0.5209511597, -2.655851054\H, 1  
4.3079330585, 1.6638089727, -1.598296095\H, 14.7358870172, 0.2355423386, -0  
.7004747308\H, 12.9109349231, -1.0316309994, -1.8461396418\H, 12.482955716  
1, 0.3967239836, -2.7441528007\H, 11.9463239788, 1.5799513723, -0.607305958  
5\H, 12.37468113, 0.1509073979, 0.2912172823\H, 10.5525171601, -1.116312670  
7, -0.8592869426\H, 10.1255088731, 0.308887093, -1.756091298\H, 9.608182589  
, 1.4989400197, 0.3819845026\H, 10.0363647354, 0.0764720598, 1.2787286172\C  
, -14.0553363966, 1.4925872844, 0.2987480217\H, 1.2817291648, -1.7393254266  
, -1.841227069\H, -1.14849238, -2.1076858128, -1.840252083\C, -2.9594515199  
, -1.4997967857, 0.1050875202\C, -3.6984802964, -0.2779516259, -0.466917535  
3\H, -1.391296685, -0.4534878715, 2.0771198992\H, 1.0492228306, -0.09064343  
95, 2.0604156543\H, -14.3190766348, 1.4011704102, -0.7529104263\H, -14.3363  
385174, 0.5509288093, 0.7658583044\C, -14.8619524626, 2.6292742543, 0.92593  
86534\H, -12.282168635, 1.7823627119, 1.4790628874\H, -12.2649063966, 2.633  
1628573, -0.0400799356\H, -11.9916792884, 0.4642061587, -1.2524494314\H, -1  
2.0104323532, -0.3875200371, 0.266164973\H, -9.9632181048, 0.8400481186, 0.  
9834650115\H, -9.945799271, 1.7006722437, -0.5290752283\H, -9.6899690207, -  
0.4289752454, -1.7728882924\H, -9.7588053571, -1.3307934941, -0.2879900284  
\O, 3.2167970351, -2.7443963385, 0.1767479726\H, -15.929516493, 2.461124958  
6, 0.8196962943\H, -14.6460998052, 2.7242253723, 1.9865069619\H, -14.628731  
536, 3.5808639919, 0.4563529216\\Version=EM64L-G09RevA.02\State=1-A\HF=-  
1590.1270602\RMSD=5.408e-09\RMSF=2.157e-06\Dipole=-12.226751, 0.9638562  
, -0.7214916\Quadrupole=-111.7649077, 50.9062721, 60.8586357, 8.0642436, -5  
.8930489, 2.3524264\PG=C01 [X(C30H56B1102)]\@

## 2h

1\1\GINC-OCTOPUS\FOpt\RHF\6-31G(d)\C31H52B1102(1-)\PIOTR\10-Mar-2011\0  
\#P HF/6-31G\* FOpt geom(noangle,nodistance) fcheck\C6-CB11-COO-PhPhC  
hx-C5\ -1,1\B, -5.7254705242, -1.3499621539, -1.1216009811\B, -5.844081421  
, 0.2374519857, -0.3085330747\B, -6.042899135, -2.6184505803, 0.1039405534\  
B, -6.2505501373, -0.0479218858, 1.4187433992\B, -6.3771774148, -1.81279301  
78, 1.6705828934\B, -7.8442874976, -0.8295152575, 1.4930513282\B, -8.454447  
8702, -1.0270045991, -0.1940319036\C, -5.2663750946, -1.1466273652, 0.53169  
69724\C, -3.8155581091, -1.1977507531, 0.9195827803\O, -3.0046203547, -1.03  
14790995, -0.1405522349\C, -1.6439585954, -1.0181996693, 0.0222629979\B, -7  
.5146193911, 0.4436539749, 0.2701174917\C, -0.9641561822, 0.1240254139, -0.  
3498457675\C, 0.4182232217, 0.1527232032, -0.2786127275\B, -7.7179061162, -  
2.4238315608, 0.6800474948\C, 1.1376633992, -0.9521214734, 0.1643821839\C,  
2.6250317559, -0.9190071318, 0.2440196209\C, 3.2995756738, -1.4148142843, 1  
.3539287206\C, 4.683138731, -1.382879579, 1.4231691532\B, -7.1916050156, -0  
.366039279, -1.2986518742\C, 5.4494772667, -0.8539405984, 0.3931559684\B, -  
7.3130415188, -2.1366380248, -1.0447932826\C, 0.4256203342, -2.0925184801,  
0.5315355866\H, -7.6663779066, -2.8763447096, -1.9082887958\C, -0.95393994  
07, -2.1336758049, 0.4610923376\H, -7.4606701568, 0.1447110292, -2.33992860  
36\C, 9.7492825229, -0.2457925679, -0.4734016343\H, -8.3519417694, -3.36839  
98149, 1.032333073\H, 9.3371221536, 0.2160348575, 1.5886122819\H, 9.4308950  
692, 1.6228405368, 0.5631262191\H, 7.2566077306, 1.0934826329, -0.454132328  
2\H, -8.0050473129, 1.5272348109, 0.3324378335\H, 7.0918990764, 1.179955317  
8, 1.2776546966\C, 7.6434277508, -1.6752598017, -0.598704862\H, 7.231727037  
7, -1.2672926532, 1.4496655106\H, -8.5598904347, -0.6458922839, 2.424698522  
4\C, 9.1694295627, -1.6676917581, -0.464828161\H, 9.598549021, -2.258537422  
5, -1.2681677881\H, -5.9516134392, -2.2893553193, 2.6636220196\H, 9.4522869  
485, -2.1591914138, 0.4662396824\H, 7.2722926226, -2.6949315236, -0.5501868  
153\H, 7.3684817878, -1.2939672275, -1.5797847698\H, -5.7338912698, 0.62139  
45642, 2.2469961604\C, 6.9656419217, -0.827374863, 0.4899521657\C, 7.536527  
3708, 0.5999898177, 0.47407826\H, -5.395199964, -3.6123201457, 0.0909381431  
\C, 9.0614849079, 0.6010169268, 0.6069438267\C, 11.2741875525, -0.215831672

2, -0.296002038\H, -5.0722694789, 1.093935436, -0.5834455473\C, 12.07912156  
41, -0.8547355633, -1.431395611\H, -4.8890848673, -1.5297581355, -1.9358347  
439\C, 13.5898049058, -0.6840707596, -1.256123162\C, 14.4068943616, -1.3254  
45468, -2.3791887049\C, -10.0193635762, -0.9761522846, -0.6073959362\C, -11  
.0181162601, -0.7498946726, 0.5344141329\C, -12.4766115087, -0.7147944151,  
0.0685167501\C, -13.4767921632, -0.4890179884, 1.204491552\C, -14.93420416  
16, -0.4539505879, 0.7396416076\C, -15.9256515784, -0.2279344068, 1.8813783  
809\H, -15.8521250043, -1.0167981911, 2.6252487712\H, -15.7338262273, 0.715  
7945347, 2.3850069741\H, -16.9507870356, -0.2079491097, 1.5207132097\H, -15  
.0565191157, 0.3319376898, -0.0033542961\H, -15.1739692095, -1.388090196, 0  
.2351500118\H, -13.3584343983, -1.2744089391, 1.9497367401\H, -13.24098674  
7, 0.4457741359, 1.7112582436\H, -12.5978124012, 0.0713555854, -0.676282218  
\H, -12.7153974646, -1.6497457048, -0.4377240792\H, -10.9032093503, -1.5332  
009589, 1.2806861572\H, -10.786047556, 0.1835212803, 1.0429559013\H, -10.16  
35032642, -0.1913571428, -1.3508037873\H, -10.2809775518, -1.9059707652, -1  
.1137652452\C, 15.9142561415, -1.1483361144, -2.1988009144\H, -1.522321115  
4, 0.9773556038, -0.6873515497\H, 0.9380261126, 1.0536050358, -0.5515060969  
\H, 0.9572189863, -2.9684599619, 0.8575104543\H, -1.4927108016, -3.01757255  
57, 0.7430943981\H, 16.1853209324, -0.0964495119, -2.1751729779\H, 16.25302  
67012, -1.5963936253, -1.2687594624\H, 16.4660932333, -1.6136426742, -3.010  
0263805\H, 14.1728809195, -2.3865465901, -2.434025825\H, 14.1054000358, -0.  
8977095012, -3.3330903698\H, 13.8292020024, 0.3766917056, -1.2000595104\H,  
13.8926777801, -1.1141970004, -0.3025989658\H, 11.8515240015, -1.914936714  
2, -1.5020268777\H, 11.7765537038, -0.4128392562, -2.3796293207\H, 11.58641  
8525, 0.8223594005, -0.1958358205\H, 11.5329776128, -0.700092693, 0.6449890  
178\O, -3.3995831496, -1.3576018563, 2.0156581264\H, 9.5167302804, 0.202323  
0069, -1.4409154051\C, 4.772499764, -0.3563129178, -0.7173947943\C, 3.39236  
8917, -0.3891494028, -0.7916610482\H, 2.9035064981, -0.015777437, -1.673703  
4291\H, 5.324034662, 0.0567022886, -1.5438405466\H, 5.1702049895, -1.770424  
7057, 2.3017240802\H, 2.7391805087, -1.8116641929, 2.1813818816\\Version=E  
M64L-G09RevA.02\State=1-A\HF=-1625.6820758\RMSD=7.496e-09\RMSF=2.908e-  
06\Dipole=12.5918865, 0.4107644, -0.7304577\Quadrupole=-120.4346056, 64.0  
799167, 56.3546889, -4.0618801, 6.426883, -3.643496\PG=C01 [X(C31H52B11O2)  
]]\@

## Pyr

1\1\GINC-MONSTER\Fopt\RHF\6-31G(d)\C16H28N1O1(1+)\PIOTR\10-Apr-2009\0\  
\#P HF/6-31G\* FOPT GEOM(NOANGLE,NODISTANCE) FCHECK\N-Butyl-4-heptylox  
ypyridinium cation, C1\1,1\O, -0.4779317225, 0.6473135911, -0.6046062704  
\C, -0.5829497383, 0.6219629894, 0.6869122492\C, 0.3891925078, 0.1297234366  
\, 1.5710664884\C, 0.1379665964, 0.1708898476, 2.9128926094\N, -0.996797342,  
0.6646018415, 3.4190152364\C, -1.2420655221, 0.6441022159, 4.8844143598\C,  
-1.9592777963, -0.6269818176, 5.3312875634\C, -2.2081563108, -0.6323158001  
, 6.842618898\C, -2.9252230211, -1.8990134168, 7.3076456886\H, -2.34322938,  
-2.7865543369, 7.080376677\H, -3.0874087366, -1.8749461796, 8.3787604753\H  
, -3.8934736279, -2.00154498, 6.8280315937\H, -1.2596637935, -0.5397600738,  
7.3657417668\H, -2.7982126984, 0.2391287317, 7.114994767\H, -2.9046057814,  
-0.7125917022, 4.8018389404\H, -1.3637523946, -1.4922356673, 5.0519109577\  
H, -0.2806138454, 0.7461549164, 5.3673069632\H, -1.8175980702, 1.5280497172  
, 5.1202487773\C, -1.9413912538, 1.1381139687, 2.5811934049\C, -1.774766368  
9, 1.1357685884, 1.2357786917\H, -2.5346150037, 1.521854196, 0.5859652598\H  
, -2.8316173837, 1.5210455807, 3.0391454148\H, 0.8545126063, -0.1942259258,  
3.6219816942\H, 1.3199518538, -0.2730317892, 1.2293362856\C, 0.6861081661,  
0.1573197111, -1.2950316311\C, 0.449798274, 0.3491524281, -2.779795684\C, 1  
.6382869452, -0.1438176892, -3.6101161811\C, 1.4197163272, 0.0411089286, -5  
.1135112354\C, 2.6009153603, -0.447975251, -5.9533130356\C, 2.3857542868, -  
0.2645595954, -7.4568509997\C, 3.5686600053, -0.7547541218, -8.2906855099\  
H, 4.4777746472, -0.2175667331, -8.0364139298\H, 3.7527591144, -1.812637073  
7, -8.1272468315\H, 3.385886573, -0.6113279185, -9.3504006384\H, 1.48595508  
96, -0.7958768691, -7.7588488098\H, 2.205435932, 0.7869781017, -7.668708398  
5\H, 3.5019298621, 0.0834874628, -5.6520415917\H, 2.7819756387, -1.50045816  
25, -5.7422346553\H, 0.5187196335, -0.4904806205, -5.412432008\H, 1.2386744  
68, 1.0934268774, -5.3222509758\H, 2.5383943715, 0.3891291211, -3.309894554  
7\H, 1.8176821959, -1.1964852838, -3.4001443538\H, -0.4521615877, -0.185478

0153, -3.0600354333\H, 0.269613374, 1.402409822, -2.9696885288\H, 1.5469317  
582, 0.7187681484, -0.9536255922\H, 0.8163796123, -0.8882994985, -1.0449638  
216\Version=x86-Linux-G98RevA.9\HF=-751.3301961\RMSD=5.659e-09\RMSF=3  
.339e-06\Dipole=-1.0113661, 0.6234517, 4.2700995\PG=C01 [X(C16H28N1O1)]\  
\@

### Cetyl

1\1\GINC-OCTOPUS\FOpt\RHF\6-31G(d)\C19H42N1(1+)\PIOTR\08-Apr-2011\0\#\n  
P HF/6-31G\* FOpt geom(noangle,nodistance) fcheck\C16H33NMe3 cation\1  
,1\N, 8.701261562, 0.1057818378, 0.0000000864\C, 7.335663524, 0.7723679844,  
0.0000001055\C, 6.1245034178, -0.1554176111, 0.0000000664\C, 4.8321483499,  
0.6744493028, 0.0000000649\C, 3.5774683441, -0.2023230949, 0.0000000491\C,  
2.2835363448, 0.6144521523, 0.00000005\C, 1.0263776858, -0.2576298881, 0.00  
00000366\C, -0.2689061763, 0.5565620112, 0.0000000366\C, -1.5269557937, -0.  
3139823855, 0.0000000366\C, -2.822798809, 0.499210533, 0.0000000182\C, -4.0  
812574589, -0.3707028298, 0.0000000131\C, -5.3773802746, 0.4420240361, 0.00  
00000006\C, -6.636013112, -0.4276248982, 0.0000000002\C, -7.9322921863, 0.3  
848540798, -0.00000008\C, -9.1909729174, -0.4844752918, -0.0000000139\C, -  
10.4878287032, 0.3269748898, -0.0000000258\C, -11.7405011736, -0.548437565  
, -0.0000000353\H, -11.7714447875, -1.1888617786, -0.8769778055\H, -11.7714  
448062, -1.1888617704, 0.8769777402\H, -12.6425392238, 0.0553855711, -0.000  
0000493\H, -10.5039285332, 0.9796019149, -0.8703469187\H, -10.5039285497, 0  
.9796019234, 0.8703468603\H, -9.1772660572, -1.1381451342, 0.8707021509\H,  
-9.1772660445, -1.1381451411, -0.8707021735\H, -7.9468129379, 1.0383305973  
, -0.8706950064\H, -7.9468129475, 1.0383306053, 0.8706949844\H, -6.62126379  
24, -1.0810651598, -0.8706831102\H, -6.6212638023, -1.0810651506, 0.8706831  
172\H, -5.3917336571, 1.0954356531, -0.870691953\H, -5.3917336671, 1.095435  
6616, 0.870691948\H, -4.0663868347, -1.0240452286, 0.8707184081\H, -4.06638  
68247, -1.0240452383, -0.8707183746\H, -2.836973357, 1.1524710301, -0.87073  
76274\H, -2.8369733688, 1.1524710322, 0.8707376619\H, -1.511899325, -0.9670  
910766, -0.8707987265\H, -1.5118993364, -0.967091075, 0.8707987841\H, -0.28  
27537458, 1.2094795358, 0.8708475878\H, -0.2827537371, 1.2094795425, -0.870  
847504\H, 1.0418312632, -0.9101940221, -0.8709965672\H, 1.041831255, -0.910  
1940294, 0.8709966407\H, 2.2703746537, 1.2665126384, -0.8711454467\H, 2.270  
3746464, 1.2665126243, 0.8711455571\H, 3.593893106, -0.8533519523, 0.871587  
1156\H, 3.5938931176, -0.8533519372, -0.8715870284\H, 4.8196690001, 1.32386  
59433, -0.8721050731\H, 4.8196689905, 1.3238659198, 0.8721052201\H, 6.13008  
25674, -0.7961304499, 0.874784211\H, 6.1300825877, -0.7961304194, -0.874784  
1007\H, 7.3222533792, 1.4078073194, -0.8749488019\H, 7.3222533706, 1.407807  
2539, 0.8749490604\C, 8.8913150055, -0.7364650344, 1.2197231267\H, 9.905071  
7039, -1.1076549596, 1.2308466863\H, 8.7138651893, -0.1320068403, 2.0965743  
835\H, 8.2046425246, -1.5659869641, 1.1985220401\C, 8.8913150701, -0.736464  
8301, -1.2197230827\H, 8.2046425473, -1.5659867299, -1.1985222033\H, 8.7138  
653619, -0.1320064748, -2.0965742502\H, 9.9050717509, -1.1076548046, -1.230  
8466197\C, 9.7368531384, 1.1852578979, 0.0000002041\H, 9.6139402363, 1.7933  
55611, 0.8832206081\H, 10.7181509893, 0.7352878766, 0.0000001689\H, 9.61394  
02575, 1.7933557865, -0.8832200935\Version=EM64L-G09RevA.02\State=1-A\H  
F=-798.2096281\RMSD=8.295e-09\RMSF=2.321e-05\Dipole=15.180958, 0.090315  
4, 0.\Quadrupole=166.5504617, -84.5298505, -82.0206112, 0.7448467, 0.000001  
5, 0.\PG=C01 [X(C19H42N1)]\@

## 6. References

- 1 B. Ringstrand, P. Kaszynski, H. Monobe *J. Mater. Chem.* 2009, **19**, 4805-4812.
- 2 M. E. Neubert, P. J. Wildman, M. J. Zawaski, C. A. Hanlon, T. L. Benyo, A. D. Vries *Mol. Cryst. Liq. Cryst.* 1987, **145**, 111-158.

- 3 K. Ohta, A. Januszko, P. Kaszynski, T. Nagamine, G. Sasnouski, Y. Endo *Liq. Cryst.* 2004, **31**, 671-682.
- 4 A. Januszko, P. Kaszynski *Liq. Cryst.* 2008, **35**, 705-710.
- 5 J. M. Kuiper, R. Hulst, J. B. F. N. Engberts *Synthesis* 2003, 695-698.
- 6 F. Vincentini, M. Mauzac, R. Laversanne, P. Pochat, J. P. Parneix *Liq. Cryst.* 1994, **16**, 721-733.
- 7 B. Ringstrand, J. Vroman, D. Jensen, A. Januszko, P. Kaszynski, J. Dziaduszek, W. Drzewinski *Liq. Cryst.* 2005, **32**, 1061-1070.
- 8 B. Gruner, Z. Janousek, B. T. King, J. N. Woodford, C. H. Wang, V. Vsetcka, J. Michl *J. Am. Chem. Soc.* 1999, **121**, 3122-3126.
- 9 J. Plesek, T. Jelinek, E. Drdakova, S. Hermanek, B. Stibr *Collect. Czech. Chem. Commun.* 1984, **49**, 1559.
- 10 Gaussian 09, Revision A.02, M. J. Frisch, G. W. Trucks, H. B. Schlegel, G. E. Scuseria, M. A. Robb, J. R. Cheeseman, G. Scalmani, V. Barone, B. Mennucci, G. A. Petersson, H. Nakatsuji, M. Caricato, X. Li, H. P. Hratchian, A. F. Izmaylov, J. Bloino, G. Zheng, J. L. Sonnenberg, M. Hada, M. Ehara, K. Toyota, R. Fukuda, J. Hasegawa, M. Ishida, T. Nakajima, Y. Honda, O. Kitao, H. Nakai, T. Vreven, J. A. Montgomery, Jr., J. E. Peralta, F. Ogliaro, M. Bearpark, J. J. Heyd, E. Brothers, K. N. Kudin, V. N. Staroverov, R. Kobayashi, J. Normand, K. Raghavachari, A. Rendell, J. C. Burant, S. S. Iyengar, J. Tomasi, M. Cossi, N. Rega, J. M. Millam, M. Klene, J. E. Knox, J. B. Cross, V. Bakken, C. Adamo, J. Jaramillo, R. Gomperts, R. E. Stratmann, O. Yazyev, A. J. Austin, R. Cammi, C. Pomelli, J. W. Ochterski, R. L. Martin, K. Morokuma, V. G. Zakrzewski, G. A. Voth, P. Salvador, J. J. Dannenberg, S. Dapprich, A. D. Daniels, O. Farkas, J. B. Foresman, J. V. Ortiz, J. Cioslowski, and D. J. Fox, Gaussian, Inc., Wallingford CT, 2009.
